# Supplementary material
Source: bioRxiv or medRxiv preprint supplement (https://medrxiv.org/highwire/filestream/91675/field_highwire_adjunct_files/0/2020.05.01.20087874-1.pdf)
Supplement: Supplementary file [file 2020.05.01.20087874-1.pdf]

Supplementary Information for

**Measuring voluntary and policy-induced social distancing behavior during the COVID-19 pandemic**

Youpei Yan, Aryn A. Malik, Jude Bayham, Eli P. Fenichel, Chandra Couzens, and Saad B. Omer

\*Corresponding Author: Eli Fenichel  
Email: [eli.fenichel@yale.edu](mailto:eli.fenichel@yale.edu)

**This PDF file includes:**

Figure S1  
Tables S1-S22

SI Materials.

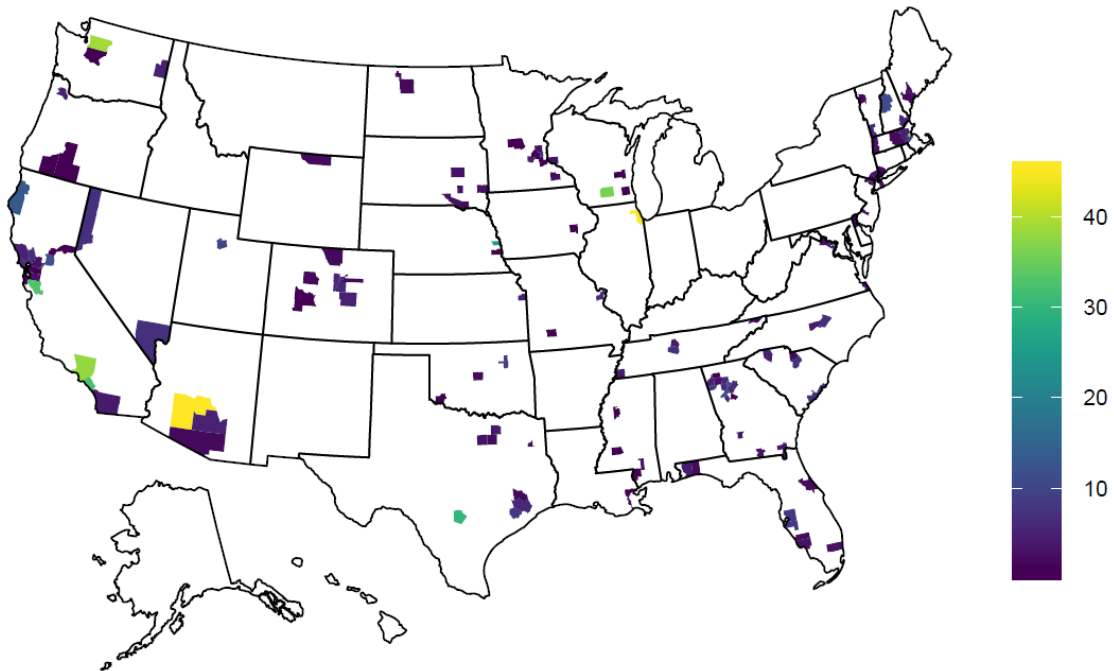

Figure S1. Number of days that passed from the time of the first case to the date of the emergency declaration. Areas in white were under emergency declaration before they experienced their first COVID-19 case.

Table S1: Summary of regression results specification (without national case interaction with the first county report). The specifications are (1) models with cumulative county cases, (2) models with cumulative state rather than county cases, (3) models with cumulative state and county cases, (4) models with new county cases rather than cumulative cases, (5) models with new state cases rather than cumulative cases, (6) models with new county and state cases rather than cumulative cases, (7) models with cumulative county deaths, (8) models with cumulative state rather than county deaths, and (9) models with cumulative state and county deaths. Model (a) is the basic county fixed effects model with no time fixed effects, (b) add fixed effects relative to the first case in the county, and (c) add fixed effects relative to the date of the stay-at-home order.

| models without national interaction | county case | state case | stay-home | school-closure | county interaction | state interaction | county crowd out % | state crowd out % |
|-------------------------------------|-------------|------------|-----------|----------------|--------------------|-------------------|--------------------|-------------------|
| 1-a                                 | 0.0591***   |            | 0.201***  | 0.145***       | -0.0336***         |                   | 56.9%              |                   |
| 1-b                                 | 0.0485***   |            | 0.162***  | 0.151***       | -0.0279***         |                   | 57.5%              |                   |
| 1-c                                 | 0.0592***   |            | 0.121***  | 0.155***       | -0.0398***         |                   | 67.2%              |                   |
| 2-a                                 |             | 0.0421***  | 0.155*    | 0.118***       |                    | -0.00180          |                    | 4.3%              |
| 2-b                                 |             | 0.0459***  | 0.213***  | 0.116***       |                    | -0.0146*          |                    | 31.8%             |
| 2-c                                 |             | 0.0429***  | 0.173**   | 0.126***       |                    | -0.0160           |                    | 37.3%             |
| 3-a                                 | 0.0459***   | 0.0324**   | 0.181**   | 0.115***       | -0.0277***         | -0.00271          | 60.3%              | 8.3%              |
| 3-b                                 | 0.0361***   | 0.0373***  | 0.235***  | 0.115***       | -0.0190**          | -0.0157*          | 52.6%              | 42.1%             |
| 3-c                                 | 0.0458***   | 0.0333**   | 0.188**   | 0.123***       | -0.0303***         | -0.0142           | 66.2%              | 42.6%             |
| 4-a                                 | 0.0509***   |            | 0.205***  | 0.178***       | -0.0253***         |                   | 49.7%              |                   |
| 4-b                                 | 0.0415***   |            | 0.143***  | 0.160***       | -0.0194**          |                   | 46.7%              |                   |
| 4-c                                 | 0.0502***   |            | 0.101***  | 0.181***       | -0.0288***         |                   | 57.4%              |                   |
| 5-a                                 |             | 0.0376***  | 0.253***  | 0.132***       |                    | -0.0168*          |                    | 44.7%             |
| 5-b                                 |             | 0.0238***  | 0.187***  | 0.139***       |                    | -0.0112           |                    | 47.1%             |
| 5-c                                 |             | 0.0377***  | 0.175***  | 0.135***       |                    | -0.0220**         |                    | 58.4%             |
| 6-a                                 | 0.0317***   | 0.0346***  | 0.263***  | 0.131***       | -0.0111*           | -0.0189*          | 35.0%              | 54.6%             |
| 6-b                                 | 0.0318***   | 0.0208***  | 0.198***  | 0.138***       | -0.0116            | -0.0136*          | 36.5%              | 65.4%             |
| 6-c                                 | 0.0310***   | 0.0348***  | 0.184***  | 0.134***       | -0.0131*           | -0.0234**         | 42.3%              | 67.2%             |
| 7-a                                 | 0.0894***   |            | 0.156***  | 0.120***       | -0.0621***         |                   | 69.5%              |                   |
| 7-b                                 | 0.0713***   |            | 0.127***  | 0.106***       | -0.0451***         |                   | 63.3%              |                   |
| 7-c                                 | 0.0920***   |            | 0.0865*** | 0.128***       | -0.0690***         |                   | 75.0%              |                   |
| 8-a                                 |             | 0.0524***  | 0.180***  | 0.0809***      |                    | -0.0277***        |                    | 52.9%             |
| 8-b                                 |             | 0.0417***  | 0.141***  | 0.0799***      |                    | -0.0183*          |                    | 43.9%             |
| 8-c                                 |             | 0.0537***  | 0.145***  | 0.0866***      |                    | -0.0368***        |                    | 68.5%             |
| 9-a                                 | 0.0371***   | 0.0508***  | 0.190***  | 0.0817***      | -0.0175*           | -0.0302***        | 47.2%              | 59.4%             |
| 9-b                                 | 0.0366***   | 0.0399***  | 0.151***  | 0.0804***      | -0.0164*           | -0.0208**         | 44.8%              | 52.1%             |
| 9-c                                 | 0.0377***   | 0.0520***  | 0.151***  | 0.0868***      | -0.0185*           | -0.0381***        | 49.1%              | 73.3%             |

Table S2. Regression table for model 1-a, 1-b, 1-c in Table 2.

|                                                 | Dep: log(dwelling time) |                          |                         |                          |                         |                          |                         |                          |
|-------------------------------------------------|-------------------------|--------------------------|-------------------------|--------------------------|-------------------------|--------------------------|-------------------------|--------------------------|
|                                                 | Basic model             |                          | With Epidemic-Day FE    |                          | With stay-home-Day FE   |                          | With Border Spillovers  |                          |
| log(county case)                                | 0.0591***<br>(0.00411)  | 0.0429***<br>(0.00501)   | 0.0485***<br>(0.00628)  | 0.0379***<br>(0.00581)   | 0.0592***<br>(0.00421)  | 0.0454***<br>(0.00527)   | 0.0541***<br>(0.00418)  | 0.0406***<br>(0.00477)   |
| log(national case)<br>* first county<br>report  |                         | 0.00410***<br>(0.000723) |                         | 0.00275***<br>(0.000654) |                         | 0.00349***<br>(0.000796) |                         | 0.00344***<br>(0.000754) |
| log(national case)                              | -0.00548<br>(0.00422)   | -0.00685<br>(0.00389)    | -0.0174**<br>(0.00540)  | -0.0179**<br>(0.00527)   | -0.00902<br>(0.00453)   | -0.0100*<br>(0.00423)    | -0.0246**<br>(0.00745)  | -0.0253***<br>(0.00721)  |
| emergency                                       | 0.0152<br>(0.0168)      | 0.0188<br>(0.0159)       | 0.0518***<br>(0.0147)   | 0.0535***<br>(0.0144)    | 0.0290<br>(0.0178)      | 0.0315<br>(0.0170)       | 0.00437<br>(0.0140)     | 0.00720<br>(0.0134)      |
| stay-home                                       | 0.201***<br>(0.0214)    | 0.183***<br>(0.0235)     | 0.162***<br>(0.0270)    | 0.151***<br>(0.0270)     | 0.121***<br>(0.0271)    | 0.109***<br>(0.0279)     | 0.0889<br>(0.0759)      | 0.0884<br>(0.0747)       |
| school closure                                  | 0.145***<br>(0.0100)    | 0.143***<br>(0.0100)     | 0.151***<br>(0.0184)    | 0.149***<br>(0.0180)     | 0.155***<br>(0.00919)   | 0.153***<br>(0.00934)    | 0.136***<br>(0.0108)    | 0.133***<br>(0.0106)     |
| log(county case)<br>* stay-home                 | -0.0336***<br>(0.00447) | -0.0237***<br>(0.00521)  | -0.0279***<br>(0.00531) | -0.0213***<br>(0.00538)  | -0.0398***<br>(0.00447) | -0.0311***<br>(0.00533)  | -0.0344***<br>(0.00427) | -0.0258***<br>(0.00474)  |
| log(total border<br>states case)                |                         |                          |                         |                          |                         |                          | 0.0242***<br>(0.00682)  | 0.0238**<br>(0.00683)    |
| log(total border<br>states case) *<br>stay-home |                         |                          |                         |                          |                         |                          | 0.0108<br>(0.00753)     | 0.00927<br>(0.00739)     |
| R2                                              | 0.775                   | 0.776                    | 0.787                   | 0.788                    | 0.620                   | 0.622                    | 0.779                   | 0.780                    |

  

|                                                | Dep: dwelling time  |                     |                      |                     |                       |                     |                        |                     |
|------------------------------------------------|---------------------|---------------------|----------------------|---------------------|-----------------------|---------------------|------------------------|---------------------|
|                                                | Basic model         |                     | With Epidemic-Day FE |                     | With stay-home-Day FE |                     | With Border Spillovers |                     |
| log(county case)                               | 37.91***<br>(2.488) | 29.41***<br>(2.678) | 32.03***<br>(3.510)  | 26.71***<br>(3.036) | 37.98***<br>(2.562)   | 30.86***<br>(2.819) | 35.15***<br>(2.549)    | 28.28***<br>(2.621) |
| log(national case)<br>* first county<br>report |                     | 2.154***<br>(0.393) |                      | 1.381**<br>(0.415)  |                       | 1.804***<br>(0.462) |                        | 1.752***<br>(0.418) |

|                                                 |           |          |           |          |           |           |           |           |
|-------------------------------------------------|-----------|----------|-----------|----------|-----------|-----------|-----------|-----------|
| log(national case)                              | 0.284     | -0.440   | -6.181*   | -6.414*  | -1.804    | -2.323    | -10.45*   | -10.84*   |
|                                                 | (2.452)   | (2.288)  | (2.922)   | (2.845)  | (2.577)   | (2.419)   | (4.174)   | (4.057)   |
| emergency                                       | -3.610    | -1.674   | 19.54*    | 20.35*   | 4.723     | 6.013     | -9.145    | -7.705    |
|                                                 | (9.992)   | (9.542)  | (8.115)   | (7.969)  | (10.30)   | (9.892)   | (8.279)   | (7.918)   |
| stay-home                                       | 108.2***  | 98.80*** | 84.95***  | 79.26*** | 60.62***  | 54.63***  | 31.91     | 31.68     |
|                                                 | (11.59)   | (12.64)  | (14.90)   | (14.62)  | (15.29)   | (15.48)   | (38.29)   | (37.53)   |
| school closure                                  | 77.51***  | 76.22*** | 81.41***  | 80.42*** | 83.65***  | 82.30***  | 72.84***  | 71.62***  |
|                                                 | (5.477)   | (5.430)  | (9.668)   | (9.388)  | (4.720)   | (4.779)   | (5.556)   | (5.470)   |
| log(county case)<br>* stay-home                 | -14.27*** | -9.080** | -11.31*** | -8.016** | -17.92*** | -13.42*** | -15.04*** | -10.66*** |
|                                                 | (2.704)   | (2.814)  | (2.856)   | (2.690)  | (2.550)   | (2.755)   | (2.781)   | (2.824)   |
| log(total border<br>states case)                |           |          |           |          |           |           | 13.43***  | 13.25***  |
|                                                 |           |          |           |          |           |           | (3.662)   | (3.665)   |
| log(total border<br>states case) *<br>stay-home |           |          |           |          |           |           | 7.551     | 6.751     |
|                                                 |           |          |           |          |           |           | (3.884)   | (3.842)   |
| R2                                              | 0.800     | 0.801    | 0.813     | 0.813    | 0.689     | 0.690     | 0.804     | 0.805     |
| N                                               | 251992    |          |           |          |           |           |           |           |

Table S3. Regression table for model 2-a, 2-b, 2-c in Table 2.

|                                                 | Dep: log(dwelling time) |                          |                         |                          |                         |                          |                         |                          |
|-------------------------------------------------|-------------------------|--------------------------|-------------------------|--------------------------|-------------------------|--------------------------|-------------------------|--------------------------|
|                                                 | Basic model             |                          | With Epidemic-Day FE    |                          | With stay-home-Day FE   |                          | With Border Spillovers  |                          |
| log(state case)                                 | 0.0421***<br>(0.0114)   | 0.0350**<br>(0.0108)     | 0.0459***<br>(0.00786)  | 0.0402***<br>(0.00759)   | 0.0429***<br>(0.0116)   | 0.0362**<br>(0.0110)     | 0.0362**<br>(0.0119)    | 0.0301*<br>(0.0112)      |
| log(national case)<br>* first county<br>report  |                         | 0.00653***<br>(0.000579) |                         | 0.00510***<br>(0.000769) |                         | 0.00607***<br>(0.000628) |                         | 0.00613***<br>(0.000552) |
| log(national case)                              | -0.0205**<br>(0.00591)  | -0.0219***<br>(0.00557)  | -0.0231***<br>(0.00528) | -0.0241***<br>(0.00501)  | -0.0237***<br>(0.00594) | -0.0247***<br>(0.00567)  | -0.0334***<br>(0.00758) | -0.0338***<br>(0.00719)  |
| emergency                                       | -0.0311<br>(0.0270)     | -0.0135<br>(0.0247)      | 0.00953<br>(0.0156)     | 0.0194<br>(0.0147)       | -0.0212<br>(0.0275)     | -0.00598<br>(0.0251)     | -0.0370<br>(0.0202)     | -0.0206<br>(0.0179)      |
| stay-home                                       | 0.155*<br>(0.0581)      | 0.147*<br>(0.0583)       | 0.213***<br>(0.0515)    | 0.204***<br>(0.0521)     | 0.173**<br>(0.0588)     | 0.161*<br>(0.0601)       | 0.115<br>(0.0827)       | 0.126<br>(0.0800)        |
| school closure                                  | 0.118***<br>(0.0234)    | 0.114***<br>(0.0214)     | 0.116***<br>(0.0199)    | 0.113***<br>(0.0188)     | 0.126***<br>(0.0235)    | 0.122***<br>(0.0215)     | 0.114***<br>(0.0191)    | 0.110***<br>(0.0175)     |
| log(state case) *<br>stay-home                  | -0.00180<br>(0.00850)   | -0.00267<br>(0.00821)    | -0.0146*<br>(0.00707)   | -0.0146*<br>(0.00685)    | -0.0160<br>(0.00942)    | -0.0151<br>(0.00933)     | -0.00767<br>(0.00849)   | -0.00696<br>(0.00809)    |
| log(total border<br>states case)                |                         |                          |                         |                          |                         |                          | 0.0203*<br>(0.00997)    | 0.0188<br>(0.00967)      |
| log(total border<br>states case) *<br>stay-home |                         |                          |                         |                          |                         |                          | 0.00856<br>(0.00931)    | 0.00534<br>(0.00872)     |
| R2                                              | 0.775                   | 0.780                    | 0.788                   | 0.791                    | 0.620                   | 0.627                    | 0.778                   | 0.781                    |

  

|                                                | Dep: dwelling time  |                     |                      |                     |                       |                     |                        |                     |
|------------------------------------------------|---------------------|---------------------|----------------------|---------------------|-----------------------|---------------------|------------------------|---------------------|
|                                                | Basic model         |                     | With Epidemic-Day FE |                     | With stay-home-Day FE |                     | With Border Spillovers |                     |
| log(state case)                                | 24.10***<br>(6.791) | 19.25**<br>(6.328)  | 27.52***<br>(4.538)  | 23.48***<br>(4.272) | 24.63***<br>(6.887)   | 20.02**<br>(6.445)  | 20.63**<br>(7.086)     | 16.45*<br>(6.598)   |
| log(national case)<br>* first county<br>report |                     | 4.442***<br>(0.364) |                      | 3.583***<br>(0.495) |                       | 4.172***<br>(0.402) |                        | 4.194***<br>(0.347) |

|                                                 |          |          |          |           |          |          |           |           |
|-------------------------------------------------|----------|----------|----------|-----------|----------|----------|-----------|-----------|
| log(national case)                              | -7.825*  | -8.817** | -9.234** | -9.999*** | -9.844** | -10.51** | -15.27*** | -15.51*** |
|                                                 | (3.533)  | (3.281)  | (2.968)  | (2.780)   | (3.449)  | (3.252)  | (4.304)   | (4.021)   |
| emergency                                       | -31.08   | -19.12   | -6.836   | 0.0798    | -24.78   | -14.35   | -34.04**  | -22.83*   |
|                                                 | (15.99)  | (14.57)  | (9.185)  | (8.473)   | (16.45)  | (14.88)  | (12.26)   | (10.76)   |
| stay-home                                       | 45.67    | 40.36    | 89.29**  | 83.01**   | 57.96    | 49.79    | 10.02     | 17.79     |
|                                                 | (34.25)  | (33.47)  | (28.61)  | (27.91)   | (32.56)  | (32.32)  | (42.97)   | (40.75)   |
| school closure                                  | 62.90*** | 60.42*** | 61.32*** | 59.30***  | 67.96*** | 64.93*** | 61.23***  | 58.52***  |
|                                                 | (13.24)  | (11.85)  | (10.54)  | (9.743)   | (13.37)  | (11.94)  | (10.52)   | (9.367)   |
| log(state case) *<br>stay-home                  | 5.310    | 4.720    | -3.567   | -3.557    | -3.364   | -2.736   | 1.077     | 1.558     |
|                                                 | (5.008)  | (4.713)  | (4.066)  | (3.772)   | (5.211)  | (4.978)  | (5.534)   | (5.178)   |
| log(total border<br>states case)                |          |          |          |           |          |          | 11.58*    | 10.57*    |
|                                                 |          |          |          |           |          |          | (5.472)   | (5.249)   |
| log(total border<br>states case) *<br>stay-home |          |          |          |           |          |          | 6.993     | 4.797     |
|                                                 |          |          |          |           |          |          | (5.449)   | (5.067)   |
| R2                                              | 0.795    | 0.801    | 0.809    | 0.813     | 0.681    | 0.689    | 0.798     | 0.803     |
| N                                               | 251992   |          |          |           |          |          |           |           |

Table S4. Regression table for model 3-a, 3-b, 3-c in Table 2.

|                                                 | Dep: log(dwelling time) |                          |                         |                          |                         |                          |                         |                          |
|-------------------------------------------------|-------------------------|--------------------------|-------------------------|--------------------------|-------------------------|--------------------------|-------------------------|--------------------------|
|                                                 | Basic model             |                          | With Epidemic-Day FE    |                          | With stay-home-Day FE   |                          | With Border Spillovers  |                          |
| log(county case)                                | 0.0459***<br>(0.00490)  | 0.0335***<br>(0.00561)   | 0.0361***<br>(0.00623)  | 0.0275***<br>(0.00563)   | 0.0458***<br>(0.00491)  | 0.0351***<br>(0.00571)   | 0.0443***<br>(0.00408)  | 0.0328***<br>(0.00501)   |
| log(state case)                                 | 0.0324**<br>(0.0110)    | 0.0315**<br>(0.0108)     | 0.0373***<br>(0.00745)  | 0.0368***<br>(0.00739)   | 0.0333**<br>(0.0111)    | 0.0325**<br>(0.0109)     | 0.0277*<br>(0.0114)     | 0.0269*<br>(0.0112)      |
| log(national case)<br>* first county<br>report  |                         | 0.00326***<br>(0.000613) |                         | 0.00229***<br>(0.000614) |                         | 0.00280***<br>(0.000663) |                         | 0.00298***<br>(0.000626) |
| log(national case)                              | -0.0209***<br>(0.00567) | -0.0215***<br>(0.00553)  | -0.0239***<br>(0.00506) | -0.0242***<br>(0.00498)  | -0.0238***<br>(0.00578) | -0.0243***<br>(0.00566)  | -0.0324***<br>(0.00723) | -0.0328***<br>(0.00706)  |
| emergency                                       | -0.0117<br>(0.0255)     | -0.00810<br>(0.0246)     | 0.0216<br>(0.0151)      | 0.0233<br>(0.0148)       | -0.00323<br>(0.0257)    | -0.000455<br>(0.0249)    | -0.0179<br>(0.0188)     | -0.0149<br>(0.0180)      |
| stay-home                                       | 0.181**<br>(0.0559)     | 0.171**<br>(0.0566)      | 0.235***<br>(0.0499)    | 0.228***<br>(0.0509)     | 0.188**<br>(0.0578)     | 0.178**<br>(0.0587)      | 0.145<br>(0.0786)       | 0.144<br>(0.0778)        |
| school closure                                  | 0.115***<br>(0.0211)    | 0.114***<br>(0.0208)     | 0.115***<br>(0.0191)    | 0.114***<br>(0.0188)     | 0.123***<br>(0.0210)    | 0.121***<br>(0.0207)     | 0.112***<br>(0.0173)    | 0.110***<br>(0.0170)     |
| log(county case)<br>* stay-home                 | -0.0277***<br>(0.00523) | -0.0199**<br>(0.00584)   | -0.0190**<br>(0.00600)  | -0.0135*<br>(0.00585)    | -0.0303***<br>(0.00543) | -0.0235***<br>(0.00606)  | -0.0276***<br>(0.00433) | -0.0203***<br>(0.00500)  |
| log(state case) *<br>stay-home                  | -0.00271<br>(0.00828)   | -0.00304<br>(0.00830)    | -0.0157*<br>(0.00713)   | -0.0159*<br>(0.00709)    | -0.0142<br>(0.00949)    | -0.0141<br>(0.00950)     | -0.00727<br>(0.00799)   | -0.00708<br>(0.00793)    |
| log(total border<br>states case)                |                         |                          |                         |                          |                         |                          | 0.0180<br>(0.00964)     | 0.0179<br>(0.00957)      |
| log(total border<br>states case) *<br>stay-home |                         |                          |                         |                          |                         |                          | 0.00722<br>(0.00872)    | 0.00597<br>(0.00853)     |
| R2                                              | 0.781                   | 0.781                    | 0.792                   | 0.792                    | 0.629                   | 0.630                    | 0.783                   | 0.783                    |

  

|                  | Dep: dwelling time  |                     |                      |                     |                       |                     |                        |                     |
|------------------|---------------------|---------------------|----------------------|---------------------|-----------------------|---------------------|------------------------|---------------------|
|                  | Basic model         |                     | With Epidemic-Day FE |                     | With stay-home-Day FE |                     | With Border Spillovers |                     |
| log(county case) | 30.87***<br>(2.782) | 24.51***<br>(2.890) | 24.87***<br>(3.447)  | 20.71***<br>(2.909) | 30.79***<br>(2.806)   | 25.38***<br>(2.939) | 29.93***<br>(2.325)    | 24.19***<br>(2.592) |
| log(state case)  | 17.37**             | 16.89*              | 21.61***             | 21.36***            | 17.86**               | 17.44**             | 14.68*                 | 14.29*              |



|                                                 |                      |                     |                      |                      |                      |                     |                      |                      |
|-------------------------------------------------|----------------------|---------------------|----------------------|----------------------|----------------------|---------------------|----------------------|----------------------|
|                                                 | (6.443)              | (6.334)             | (4.196)              | (4.160)              | (6.521)              | (6.430)             | (6.742)              | (6.630)              |
| log(national case)<br>* first county<br>report  |                      | 1.660***<br>(0.333) |                      | 1.100**<br>(0.382)   |                      | 1.415***<br>(0.384) |                      | 1.498***<br>(0.346)  |
| log(national case)<br>emergency                 | -8.223*<br>(3.301)   | -8.532*<br>(3.224)  | -9.881***<br>(2.790) | -10.03***<br>(2.740) | -9.825**<br>(3.282)  | -10.04**<br>(3.223) | -14.65***<br>(4.023) | -14.87***<br>(3.947) |
| stay-home                                       | -16.87<br>(15.00)    | -15.05<br>(14.61)   | 2.409<br>(8.629)     | 3.202<br>(8.478)     | -12.11<br>(15.03)    | -10.71<br>(14.68)   | -20.32<br>(11.17)    | -18.78<br>(10.76)    |
| school closure                                  | 76.37*<br>(32.74)    | 70.96*<br>(32.74)   | 118.0***<br>(26.34)  | 114.4***<br>(26.55)  | 76.67*<br>(33.25)    | 71.96*<br>(33.49)   | 54.52<br>(38.65)     | 53.55<br>(37.99)     |
|                                                 | 62.25***<br>(11.82)  | 61.66***<br>(11.62) | 61.04***<br>(9.979)  | 60.49***<br>(9.791)  | 66.14***<br>(11.70)  | 65.50***<br>(11.52) | 60.19***<br>(9.283)  | 59.48***<br>(9.129)  |
| log(county case)<br>* stay-home                 | -11.91***<br>(2.781) | -7.936**<br>(2.879) | -6.468*<br>(3.124)   | -3.853<br>(2.861)    | -13.35***<br>(2.844) | -9.922**<br>(2.942) | -11.89***<br>(2.355) | -8.243**<br>(2.545)  |
| log(state case) *<br>stay-home                  | 1.398<br>(4.793)     | 1.233<br>(4.771)    | -7.812*<br>(3.840)   | -7.905*<br>(3.793)   | -4.677<br>(5.423)    | -4.621<br>(5.395)   | -1.258<br>(4.990)    | -1.164<br>(4.945)    |
| log(total border<br>states case)                |                      |                     |                      |                      |                      |                     | 10.09<br>(5.366)     | 10.03<br>(5.330)     |
| log(total border<br>states case) *<br>stay-home |                      |                     |                      |                      |                      |                     | 4.324<br>(4.913)     | 3.693<br>(4.858)     |
| R2                                              | 0.805                | 0.806               | 0.817                | 0.817                | 0.696                | 0.696               | 0.807                | 0.808                |
| N                                               | 251992               |                     |                      |                      |                      |                     |                      |                      |

Table S5. Regression Table for model 4-a, 4-b, 4-c in Table 2.

|                                                 | Dep: log(dwelling time)  |                         |                         |                          |                         |                         |                         |                          |
|-------------------------------------------------|--------------------------|-------------------------|-------------------------|--------------------------|-------------------------|-------------------------|-------------------------|--------------------------|
|                                                 | Basic model              |                         | With Epidemic-Day FE    |                          | With stay-home-Day FE   |                         | With Border Spillovers  |                          |
| log(new county case)                            | 0.0509***<br>(0.00506)   | 0.0210***<br>(0.00524)  | 0.0415***<br>(0.00636)  | 0.0220***<br>(0.00466)   | 0.0502***<br>(0.00506)  | 0.0236***<br>(0.00543)  | 0.0408***<br>(0.00454)  | 0.0197***<br>(0.00477)   |
| log(new national case)<br>* first county report |                          | 0.00961***<br>(0.00106) |                         | 0.00662***<br>(0.000963) |                         | 0.00860***<br>(0.00115) |                         | 0.00725***<br>(0.000924) |
| log(new national case)                          | -0.00954***<br>(0.00241) | -0.0119***<br>(0.00197) | -0.0171***<br>(0.00188) | -0.0171***<br>(0.00188)  | -0.0106***<br>(0.00238) | -0.0125***<br>(0.00197) | -0.0270***<br>(0.00266) | -0.0263***<br>(0.00267)  |
| emergency                                       | 0.0412**<br>(0.0125)     | 0.0455***<br>(0.0113)   | 0.0573***<br>(0.0151)   | 0.0598***<br>(0.0147)    | 0.0473***<br>(0.0124)   | 0.0501***<br>(0.0113)   | 0.01000<br>(0.0111)     | 0.0175<br>(0.0102)       |
| stay-home                                       | 0.205***<br>(0.0161)     | 0.166***<br>(0.0180)    | 0.143***<br>(0.0261)    | 0.124***<br>(0.0234)     | 0.101***<br>(0.0250)    | 0.0817**<br>(0.0248)    | 0.119<br>(0.0734)       | 0.118<br>(0.0710)        |
| school closure                                  | 0.178***<br>(0.0119)     | 0.158***<br>(0.0112)    | 0.160***<br>(0.0249)    | 0.148***<br>(0.0220)     | 0.181***<br>(0.0117)    | 0.163***<br>(0.0109)    | 0.137***<br>(0.0123)    | 0.128***<br>(0.0115)     |
| log(new county case) * stay-home                | -0.0253***<br>(0.00511)  | -0.00261<br>(0.00558)   | -0.0194**<br>(0.00585)  | -0.00430<br>(0.00496)    | -0.0288***<br>(0.00492) | -0.00790<br>(0.00551)   | -0.0216***<br>(0.00436) | -0.00473<br>(0.00475)    |
| log(total border states case)                   |                          |                         |                         |                          |                         |                         | 0.0315***<br>(0.00453)  | 0.0270***<br>(0.00440)   |
| log(total border states case) * stay-home       |                          |                         |                         |                          |                         |                         | 0.00402<br>(0.00760)    | 0.00183<br>(0.00733)     |
| R2                                              | 0.769                    | 0.775                   | 0.785                   | 0.788                    | 0.612                   | 0.621                   | 0.778                   | 0.781                    |

  

|                                                 | Dep: dwelling time  |                     |                      |                     |                       |                     |                        |                     |
|-------------------------------------------------|---------------------|---------------------|----------------------|---------------------|-----------------------|---------------------|------------------------|---------------------|
|                                                 | Basic model         |                     | With Epidemic-Day FE |                     | With stay-home-Day FE |                     | With Border Spillovers |                     |
| log(new county case)                            | 32.59***<br>(3.163) | 12.42***<br>(2.801) | 27.17***<br>(3.733)  | 13.69***<br>(2.500) | 32.16***<br>(3.169)   | 14.32***<br>(2.898) | 26.23***<br>(2.661)    | 11.99***<br>(2.483) |
| log(new national case)<br>* first county report |                     | 6.478***<br>(0.606) |                      | 4.565***<br>(0.638) |                       | 5.752***<br>(0.700) |                        | 4.891***<br>(0.526) |

|                                           |                     |                      |                      |                      |                     |                      |                      |                      |
|-------------------------------------------|---------------------|----------------------|----------------------|----------------------|---------------------|----------------------|----------------------|----------------------|
| log(new national case)                    | -2.577<br>(1.432)   | -4.153***<br>(1.152) | -7.744***<br>(0.885) | -7.755***<br>(0.879) | -3.320*<br>(1.403)  | -4.608***<br>(1.142) | -13.49***<br>(1.487) | -12.99***<br>(1.446) |
| emergency                                 | 11.74<br>(7.620)    | 14.59*<br>(6.818)    | 21.80*<br>(8.167)    | 23.53**<br>(7.859)   | 16.37*<br>(7.425)   | 18.25**<br>(6.710)   | -7.393<br>(6.675)    | -2.325<br>(5.986)    |
| stay-home                                 | 124.2***<br>(9.177) | 98.05***<br>(10.10)  | 83.55***<br>(15.51)  | 70.03***<br>(13.32)  | 54.74***<br>(15.10) | 41.51**<br>(14.57)   | 33.83<br>(38.78)     | 32.82<br>(36.29)     |
| school closure                            | 100.0***<br>(6.598) | 86.62***<br>(5.911)  | 90.02***<br>(13.98)  | 82.10***<br>(11.83)  | 102.6***<br>(6.391) | 90.29***<br>(5.605)  | 75.43***<br>(6.449)  | 69.04***<br>(5.928)  |
| log(new county case) * stay-home          | -7.245*<br>(3.054)  | 8.083**<br>(2.942)   | -4.092<br>(3.207)    | 6.297*<br>(2.479)    | -9.814**<br>(2.857) | 4.194<br>(2.771)     | -5.459*<br>(2.583)   | 5.910*<br>(2.574)    |
| log(total border states case)             |                     |                      |                      |                      |                     |                      | 19.57***<br>(2.579)  | 16.56***<br>(2.361)  |
| log(total border states case) * stay-home |                     |                      |                      |                      |                     |                      | 6.349<br>(4.058)     | 4.872<br>(3.817)     |
| R2                                        | 0.788               | 0.797                | 0.807                | 0.811                | 0.675               | 0.686                | 0.800                | 0.804                |
| N                                         | 251992              |                      |                      |                      |                     |                      |                      |                      |

Table S6, Regression table for model 5-a, 5-b, 5-c in Table 2.

|                                                 | Dep: log(dwelling time) |                          |                         |                          |                         |                          |                         |                          |
|-------------------------------------------------|-------------------------|--------------------------|-------------------------|--------------------------|-------------------------|--------------------------|-------------------------|--------------------------|
|                                                 | Basic model             |                          | With Epidemic-Day FE    |                          | With stay-home-Day FE   |                          | With Border Spillovers  |                          |
| log(new state case)                             | 0.0376***<br>(0.00604)  | 0.0303***<br>(0.00513)   | 0.0238***<br>(0.00504)  | 0.0200***<br>(0.00457)   | 0.0377***<br>(0.00610)  | 0.0313***<br>(0.00522)   | 0.0271***<br>(0.00641)  | 0.0228***<br>(0.00574)   |
| log(new national case)<br>* first county report |                         | 0.00881***<br>(0.000826) |                         | 0.00690***<br>(0.000988) |                         | 0.00782***<br>(0.000875) |                         | 0.00727***<br>(0.000724) |
| log(new national case)                          | -0.0161***<br>(0.00226) | -0.0172***<br>(0.00204)  | -0.0197***<br>(0.00165) | -0.0194***<br>(0.00166)  | -0.0172***<br>(0.00216) | -0.0180***<br>(0.00198)  | -0.0277***<br>(0.00267) | -0.0267***<br>(0.00270)  |
| emergency                                       | 0.00546<br>(0.0149)     | 0.0157<br>(0.0132)       | 0.0335*<br>(0.0160)     | 0.0392*<br>(0.0153)      | 0.0108<br>(0.0150)      | 0.0192<br>(0.0134)       | -0.00949<br>(0.0116)    | 0.00130<br>(0.0105)      |
| stay-home                                       | 0.253***<br>(0.0356)    | 0.219***<br>(0.0366)     | 0.187***<br>(0.0405)    | 0.171***<br>(0.0391)     | 0.175***<br>(0.0361)    | 0.154***<br>(0.0364)     | 0.138<br>(0.0795)       | 0.136<br>(0.0768)        |
| school closure                                  | 0.132***<br>(0.0144)    | 0.120***<br>(0.0133)     | 0.139***<br>(0.0230)    | 0.129***<br>(0.0202)     | 0.135***<br>(0.0145)    | 0.124***<br>(0.0135)     | 0.116***<br>(0.0127)    | 0.108***<br>(0.0118)     |
| log(new state case) * stay-home                 | -0.0168*<br>(0.00700)   | -0.0148*<br>(0.00678)    | -0.0112<br>(0.00660)    | -0.0109<br>(0.00645)     | -0.0220**<br>(0.00681)  | -0.0195**<br>(0.00653)   | -0.0186**<br>(0.00669)  | -0.0165*<br>(0.00646)    |
| log(total border states case)                   |                         |                          |                         |                          |                         |                          | 0.0244***<br>(0.00527)  | 0.0205***<br>(0.00520)   |
| log(total border states case) * stay-home       |                         |                          |                         |                          |                         |                          | 0.0105<br>(0.00798)     | 0.00786<br>(0.00757)     |
| R2                                              | 0.773                   | 0.779                    | 0.785                   | 0.788                    | 0.619                   | 0.627                    | 0.779                   | 0.783                    |

  

|                                                 | Dep: dwelling time  |                     |                      |                     |                       |                     |                        |                     |
|-------------------------------------------------|---------------------|---------------------|----------------------|---------------------|-----------------------|---------------------|------------------------|---------------------|
|                                                 | Basic model         |                     | With Epidemic-Day FE |                     | With stay-home-Day FE |                     | With Border Spillovers |                     |
| log(new state case)                             | 22.44***<br>(3.754) | 17.43***<br>(3.074) | 13.89***<br>(2.888)  | 11.17***<br>(2.512) | 22.57***<br>(3.786)   | 18.12***<br>(3.113) | 15.75***<br>(3.817)    | 12.78***<br>(3.348) |
| log(new national case)<br>* first county report |                     | 6.120***<br>(0.450) |                      | 4.877***<br>(0.661) |                       | 5.411***<br>(0.516) |                        | 5.049***<br>(0.413) |

|                                           |                      |                      |                      |                      |                      |                      |                      |                      |
|-------------------------------------------|----------------------|----------------------|----------------------|----------------------|----------------------|----------------------|----------------------|----------------------|
| log(new national case)                    | -6.471***<br>(1.340) | -7.230***<br>(1.187) | -9.196***<br>(0.810) | -8.972***<br>(0.802) | -7.220***<br>(1.251) | -7.788***<br>(1.128) | -13.83***<br>(1.468) | -13.17***<br>(1.438) |
| emergency                                 | -9.354<br>(8.890)    | -2.232<br>(7.760)    | 8.072<br>(8.978)     | 12.13<br>(8.498)     | -5.212<br>(8.999)    | 0.557<br>(7.937)     | -18.68*<br>(7.097)   | -11.18<br>(6.241)    |
| stay-home                                 | 130.0***<br>(19.41)  | 106.6***<br>(19.40)  | 90.97***<br>(21.49)  | 79.99***<br>(19.86)  | 78.56***<br>(19.79)  | 64.40**<br>(19.30)   | 28.02<br>(43.97)     | 26.95<br>(41.21)     |
| school closure                            | 72.77***<br>(7.685)  | 64.41***<br>(6.873)  | 78.76***<br>(13.08)  | 71.55***<br>(10.91)  | 75.29***<br>(7.729)  | 67.52***<br>(6.947)  | 63.15***<br>(6.360)  | 57.92***<br>(5.778)  |
| log(new state case) * stay-home           | -4.726<br>(3.883)    | -3.395<br>(3.630)    | -2.065<br>(3.578)    | -1.883<br>(3.360)    | -8.491*<br>(3.722)   | -6.754<br>(3.384)    | -6.875<br>(3.887)    | -5.388<br>(3.670)    |
| log(total border states case)             |                      |                      |                      |                      |                      |                      | 15.43***<br>(2.909)  | 12.75***<br>(2.782)  |
| log(total border states case) * stay-home |                      |                      |                      |                      |                      |                      | 10.18*<br>(4.612)    | 8.358<br>(4.311)     |
| R2                                        | 0.790                | 0.798                | 0.805                | 0.810                | 0.679                | 0.689                | 0.798                | 0.803                |
| N                                         | 251992               |                      |                      |                      |                      |                      |                      |                      |

Table S7. Regression table for model 6-a, 6-b, 6-c in Table 2.

|                                              | Dep: log(dwelling time) |                          |                         |                          |                         |                          |                         |                          |
|----------------------------------------------|-------------------------|--------------------------|-------------------------|--------------------------|-------------------------|--------------------------|-------------------------|--------------------------|
|                                              | Basic model             |                          | With Epidemic-Day FE    |                          | With stay-home-Day FE   |                          | With Border Spillovers  |                          |
| log(new county case)                         | 0.0317***<br>(0.00524)  | 0.00838<br>(0.00547)     | 0.0318***<br>(0.00631)  | 0.0143**<br>(0.00461)    | 0.0310***<br>(0.00526)  | 0.0106<br>(0.00566)      | 0.0296***<br>(0.00502)  | 0.0110*<br>(0.00533)     |
| log(new state case)                          | 0.0346***<br>(0.00608)  | 0.0298***<br>(0.00522)   | 0.0208***<br>(0.00502)  | 0.0189***<br>(0.00461)   | 0.0348***<br>(0.00613)  | 0.0306***<br>(0.00532)   | 0.0244***<br>(0.00652)  | 0.0221***<br>(0.00591)   |
| log(new national case) * first county report |                         | 0.00834***<br>(0.000910) |                         | 0.00625***<br>(0.000948) |                         | 0.00734***<br>(0.000968) |                         | 0.00676***<br>(0.000821) |
| log(new national case)                       | -0.0161***<br>(0.00224) | -0.0172***<br>(0.00201)  | -0.0197***<br>(0.00163) | -0.0194***<br>(0.00164)  | -0.0171***<br>(0.00215) | -0.0179***<br>(0.00195)  | -0.0275***<br>(0.00268) | -0.0268***<br>(0.00272)  |
| emergency                                    | 0.00856<br>(0.0149)     | 0.0164<br>(0.0133)       | 0.0361*<br>(0.0159)     | 0.0402*<br>(0.0154)      | 0.0136<br>(0.0149)      | 0.0198<br>(0.0135)       | -0.00650<br>(0.0116)    | 0.00197<br>(0.0105)      |
| stay-home                                    | 0.263***<br>(0.0348)    | 0.230***<br>(0.0363)     | 0.198***<br>(0.0400)    | 0.183***<br>(0.0388)     | 0.184***<br>(0.0355)    | 0.164***<br>(0.0361)     | 0.156*<br>(0.0771)      | 0.153*<br>(0.0749)       |
| school closure                               | 0.131***<br>(0.0143)    | 0.120***<br>(0.0134)     | 0.138***<br>(0.0226)    | 0.130***<br>(0.0202)     | 0.134***<br>(0.0144)    | 0.124***<br>(0.0135)     | 0.115***<br>(0.0125)    | 0.108***<br>(0.0118)     |
| log(new county case) * stay-home             | -0.0111*<br>(0.00541)   | 0.00718<br>(0.00586)     | -0.0116<br>(0.00620)    | 0.00239<br>(0.00516)     | -0.0131*<br>(0.00551)   | 0.00323<br>(0.00601)     | -0.0112*<br>(0.00482)   | 0.00366<br>(0.00527)     |
| log(new state case) * stay-home              | -0.0189*<br>(0.00710)   | -0.0179*<br>(0.00692)    | -0.0136*<br>(0.00677)   | -0.0140*<br>(0.00663)    | -0.0234**<br>(0.00707)  | -0.0219**<br>(0.00682)   | -0.0201**<br>(0.00676)  | -0.0189**<br>(0.00659)   |
| log(total border states case)                |                         |                          |                         |                          |                         |                          | 0.0241***<br>(0.00532)  | 0.0207***<br>(0.00525)   |
| log(total border states case) * stay-home    |                         |                          |                         |                          |                         |                          | 0.00941<br>(0.00775)    | 0.00703<br>(0.00738)     |
| R2                                           | 0.775                   | 0.780                    | 0.787                   | 0.789                    | 0.622                   | 0.628                    | 0.780                   | 0.783                    |

  

|                      | Dep: dwelling time  |                  |                      |                     |                       |                   |                        |                   |
|----------------------|---------------------|------------------|----------------------|---------------------|-----------------------|-------------------|------------------------|-------------------|
|                      | Basic model         |                  | With Epidemic-Day FE |                     | With stay-home-Day FE |                   | With Border Spillovers |                   |
| log(new county case) | 21.24***<br>(2.886) | 5.322<br>(2.793) | 21.63***<br>(3.659)  | 9.494***<br>(2.472) | 20.78***<br>(2.903)   | 6.895*<br>(2.899) | 19.87***<br>(2.748)    | 7.190*<br>(2.703) |
| log(new state case)  | 20.35***            | 17.11***         | 11.75***             | 10.42***            | 20.53***              | 17.67***          | 13.90***               | 12.27***          |

|                                              |                      |                      |                      |                      |                      |                      |                      |                      |
|----------------------------------------------|----------------------|----------------------|----------------------|----------------------|----------------------|----------------------|----------------------|----------------------|
|                                              | (3.755)              | (3.127)              | (2.856)              | (2.552)              | (3.780)              | (3.177)              | (3.881)              | (3.461)              |
| log(new national case) * first county report |                      | 5.695***<br>(0.490)  |                      | 4.331***<br>(0.631)  |                      | 4.990***<br>(0.569)  |                      | 4.611***<br>(0.458)  |
| log(new national case)                       | -6.491***<br>(1.322) | -7.243***<br>(1.173) | -9.217***<br>(0.781) | -9.052***<br>(0.781) | -7.197***<br>(1.237) | -7.767***<br>(1.116) | -13.74***<br>(1.489) | -13.24***<br>(1.470) |
| emergency                                    | -6.938<br>(8.944)    | -1.559<br>(7.907)    | 10.15<br>(8.919)     | 12.98<br>(8.509)     | -3.127<br>(8.994)    | 1.139<br>(8.044)     | -16.36*<br>(7.037)   | -10.58<br>(6.237)    |
| stay-home                                    | 141.2***<br>(18.56)  | 118.7***<br>(18.77)  | 103.8***<br>(20.49)  | 93.26***<br>(18.91)  | 90.18***<br>(19.09)  | 76.26***<br>(18.77)  | 49.34<br>(41.05)     | 47.26<br>(38.41)     |
| school closure                               | 72.26***<br>(7.614)  | 64.92***<br>(6.936)  | 77.91***<br>(12.73)  | 71.81***<br>(10.93)  | 74.66***<br>(7.634)  | 67.90***<br>(6.993)  | 62.60***<br>(6.233)  | 58.08***<br>(5.774)  |
| log(new county case) * stay-home             | 0.193<br>(2.854)     | 12.66***<br>(2.869)  | -0.295<br>(3.328)    | 9.388***<br>(2.510)  | -1.304<br>(2.929)    | 9.805**<br>(2.935)   | -0.110<br>(2.505)    | 10.05***<br>(2.563)  |
| log(new state case) * stay-home              | -7.955*<br>(3.817)   | -7.269*<br>(3.591)   | -5.663<br>(3.493)    | -5.907<br>(3.285)    | -11.09**<br>(3.849)  | -10.05**<br>(3.551)  | -9.478*<br>(3.807)   | -8.624*<br>(3.649)   |
| log(total border states case)                |                      |                      |                      |                      |                      |                      | 15.24***<br>(2.965)  | 12.92***<br>(2.841)  |
| log(total border states case) * stay-home    |                      |                      |                      |                      |                      |                      | 8.876*<br>(4.348)    | 7.258<br>(4.092)     |
| R2                                           | 0.795                | 0.801                | 0.809                | 0.813                | 0.685                | 0.692                | 0.802                | 0.806                |
| N                                            | 251992               |                      |                      |                      |                      |                      |                      |                      |

Table S8. Regression table for model 7-a, 7-b, 7-c in Table 2.

|                                           | Dep: log(dwelling time) |                          |                        |                          |                        |                          |                        |                          |
|-------------------------------------------|-------------------------|--------------------------|------------------------|--------------------------|------------------------|--------------------------|------------------------|--------------------------|
|                                           | Basic model             |                          | With Epidemic-Day FE   |                          | With stay-home-Day FE  |                          | With Border Spillovers |                          |
| log(county death)                         | 0.0894***<br>(0.0103)   | 0.0616***<br>(0.00947)   | 0.0713***<br>(0.0126)  | 0.0504***<br>(0.00992)   | 0.0920***<br>(0.0109)  | 0.0649***<br>(0.0102)    | 0.0910***<br>(0.0105)  | 0.0639***<br>(0.00956)   |
| log(national death) * first county report |                         | 0.00980***<br>(0.000794) |                        | 0.00802***<br>(0.000836) |                        | 0.00932***<br>(0.000880) |                        | 0.00945***<br>(0.000854) |
| log(national death)                       | 0.0157***<br>(0.00436)  | 0.00823*<br>(0.00382)    | 0.0215**<br>(0.00671)  | 0.0166**<br>(0.00598)    | 0.0125*<br>(0.00507)   | 0.00638<br>(0.00435)     | 0.0158*<br>(0.00727)   | 0.00992<br>(0.00663)     |
| emergency                                 | -0.0429**<br>(0.0152)   | -0.0252<br>(0.0135)      | 0.00565<br>(0.0140)    | 0.0163<br>(0.0129)       | -0.0325<br>(0.0173)    | -0.0191<br>(0.0152)      | -0.0318*<br>(0.0147)   | -0.0166<br>(0.0131)      |
| stay-home                                 | 0.156***<br>(0.0190)    | 0.132***<br>(0.0191)     | 0.127***<br>(0.0220)   | 0.110***<br>(0.0204)     | 0.0865***<br>(0.0238)  | 0.0751**<br>(0.0231)     | -0.00371<br>(0.0653)   | 0.0351<br>(0.0630)       |
| school closure                            | 0.120***<br>(0.00907)   | 0.114***<br>(0.00882)    | 0.106***<br>(0.0168)   | 0.101***<br>(0.0160)     | 0.128***<br>(0.00821)  | 0.120***<br>(0.00821)    | 0.130***<br>(0.00833)  | 0.123***<br>(0.00814)    |
| log(county death) * stay-home             | -0.0621***<br>(0.00982) | -0.0394***<br>(0.00927)  | -0.0451***<br>(0.0115) | -0.0276**<br>(0.00958)   | -0.0690***<br>(0.0106) | -0.0449***<br>(0.0102)   | -0.0685***<br>(0.0105) | -0.0443***<br>(0.00948)  |
| log(total border states case)             |                         |                          |                        |                          |                        |                          | -0.00347<br>(0.00541)  | -0.00410<br>(0.00544)    |
| log(total border states case) * stay-home |                         |                          |                        |                          |                        |                          | 0.0173*<br>(0.00670)   | 0.0107<br>(0.00649)      |
| R2                                        | 0.772                   | 0.777                    | 0.784                  | 0.787                    | 0.612                  | 0.619                    | 0.773                  | 0.777                    |

  

|                                           | Dep: dwelling time  |                     |                      |                     |                       |                     |                        |                     |
|-------------------------------------------|---------------------|---------------------|----------------------|---------------------|-----------------------|---------------------|------------------------|---------------------|
|                                           | Basic model         |                     | With Epidemic-Day FE |                     | With stay-home-Day FE |                     | With Border Spillovers |                     |
| log(county death)                         | 63.61***<br>(6.519) | 44.80***<br>(5.474) | 53.19***<br>(7.558)  | 38.49***<br>(5.523) | 65.16***<br>(6.804)   | 46.64***<br>(5.829) | 64.41***<br>(6.835)    | 46.16***<br>(5.765) |
| log(national death) * first county report |                     | 6.645***<br>(0.437) |                      | 5.623***<br>(0.529) |                       | 6.374***<br>(0.516) |                        | 6.378***<br>(0.488) |



|                                              |                      |                     |                      |                     |                      |                      |                      |                      |
|----------------------------------------------|----------------------|---------------------|----------------------|---------------------|----------------------|----------------------|----------------------|----------------------|
| log(national death)                          | 12.39***<br>(2.558)  | 7.311**<br>(2.234)  | 15.01***<br>(3.710)  | 11.60***<br>(3.229) | 10.36***<br>(2.943)  | 6.203*<br>(2.480)    | 11.32**<br>(4.126)   | 7.357<br>(3.736)     |
| emergency                                    | -34.34***<br>(9.151) | -22.32**<br>(8.098) | -4.297<br>(7.969)    | 3.143<br>(7.137)    | -27.77**<br>(10.21)  | -18.55*<br>(8.818)   | -28.82**<br>(8.621)  | -18.56*<br>(7.470)   |
| stay-home                                    | 92.24***<br>(10.57)  | 76.19***<br>(10.28) | 74.97***<br>(12.60)  | 62.87***<br>(11.14) | 48.77**<br>(13.94)   | 40.99**<br>(13.21)   | -14.92<br>(32.94)    | 11.29<br>(30.48)     |
| school closure                               | 65.28***<br>(5.199)  | 61.70***<br>(4.863) | 59.22***<br>(9.261)  | 56.00***<br>(8.594) | 70.69***<br>(4.492)  | 65.31***<br>(4.351)  | 71.00***<br>(4.592)  | 65.98***<br>(4.300)  |
| log(county death)<br>* stay-home             | -34.53***<br>(6.309) | -19.14**<br>(5.531) | -25.23***<br>(6.848) | -12.91*<br>(5.355)  | -38.89***<br>(6.547) | -22.37***<br>(5.748) | -38.68***<br>(7.098) | -22.37***<br>(6.048) |
| log(total border states case)                |                      |                     |                      |                     |                      |                      | -0.730<br>(2.853)    | -1.155<br>(2.886)    |
| log(total border states case) *<br>stay-home |                      |                     |                      |                     |                      |                      | 11.55**<br>(3.456)   | 7.088*<br>(3.216)    |
| R2                                           | 0.797                | 0.803               | 0.810                | 0.814               | 0.681                | 0.690                | 0.798                | 0.804                |
| N                                            | 251992               |                     |                      |                     |                      |                      |                      |                      |

Table S9. Regression table for model 8-a, 8-b, 8-c in Table 2.

|                                           | Dep: log(dwelling time) |                          |                        |                          |                         |                          |                         |                          |
|-------------------------------------------|-------------------------|--------------------------|------------------------|--------------------------|-------------------------|--------------------------|-------------------------|--------------------------|
|                                           | Basic model             |                          | With Epidemic-Day FE   |                          | With stay-home-Day FE   |                          | With Border Spillovers  |                          |
| log(state death)                          | 0.0524***<br>(0.00803)  | 0.0456***<br>(0.00798)   | 0.0417***<br>(0.00993) | 0.0362***<br>(0.00951)   | 0.0537***<br>(0.00840)  | 0.0471***<br>(0.00838)   | 0.0555***<br>(0.00821)  | 0.0488***<br>(0.00807)   |
| log(national death) * first county report |                         | 0.00741***<br>(0.000843) |                        | 0.00658***<br>(0.000752) |                         | 0.00701***<br>(0.000911) |                         | 0.00708***<br>(0.000833) |
| log(national death)                       | 0.00247<br>(0.00519)    | -0.00119<br>(0.00478)    | 0.0145*<br>(0.00621)   | 0.0115<br>(0.00576)      | -0.000176<br>(0.00548)  | -0.00323<br>(0.00502)    | 0.00809<br>(0.00728)    | 0.00470<br>(0.00688)     |
| emergency                                 | -0.0213<br>(0.0149)     | -0.0119<br>(0.0138)      | 0.0107<br>(0.0135)     | 0.0179<br>(0.0128)       | -0.0139<br>(0.0157)     | -0.00613<br>(0.0145)     | -0.00281<br>(0.0155)    | 0.00494<br>(0.0144)      |
| stay-home                                 | 0.180***<br>(0.0259)    | 0.168***<br>(0.0261)     | 0.141***<br>(0.0289)   | 0.132***<br>(0.0287)     | 0.145***<br>(0.0311)    | 0.134***<br>(0.0313)     | 0.0333<br>(0.0723)      | 0.0539<br>(0.0689)       |
| school closure                            | 0.0809***<br>(0.0106)   | 0.0809***<br>(0.0101)    | 0.0799***<br>(0.0122)  | 0.0792***<br>(0.0120)    | 0.0866***<br>(0.0107)   | 0.0856***<br>(0.0101)    | 0.0944***<br>(0.0114)   | 0.0929***<br>(0.0110)    |
| log(state death) * stay-home              | -0.0277***<br>(0.00664) | -0.0260***<br>(0.00633)  | -0.0183*<br>(0.00690)  | -0.0172*<br>(0.00663)    | -0.0368***<br>(0.00781) | -0.0337***<br>(0.00748)  | -0.0365***<br>(0.00846) | -0.0332***<br>(0.00790)  |
| log(total border states case)             |                         |                          |                        |                          |                         |                          | -0.0113*<br>(0.00490)   | -0.0109*<br>(0.00484)    |
| log(total border states case) * stay-home |                         |                          |                        |                          |                         |                          | 0.0194*<br>(0.00858)    | 0.0152<br>(0.00807)      |
| R2                                        | 0.780                   | 0.782                    | 0.788                  | 0.790                    | 0.625                   | 0.629                    | 0.781                   | 0.783                    |

  

|                                           | Dep: dwelling time  |                     |                      |                     |                       |                     |                        |                     |
|-------------------------------------------|---------------------|---------------------|----------------------|---------------------|-----------------------|---------------------|------------------------|---------------------|
|                                           | Basic model         |                     | With Epidemic-Day FE |                     | With stay-home-Day FE |                     | With Border Spillovers |                     |
| log(state death)                          | 33.19***<br>(4.815) | 28.42***<br>(4.555) | 27.57***<br>(5.538)  | 23.62***<br>(5.099) | 33.92***<br>(5.002)   | 29.21***<br>(4.744) | 34.73***<br>(5.105)    | 30.04***<br>(4.804) |
| log(national death) * first county report |                     | 5.182***<br>(0.386) |                      | 4.737***<br>(0.448) |                       | 4.973***<br>(0.430) |                        | 4.971***<br>(0.399) |

|                                              |                     |                     |                     |                     |                      |                      |                     |                     |
|----------------------------------------------|---------------------|---------------------|---------------------|---------------------|----------------------|----------------------|---------------------|---------------------|
| log(national death)                          | 3.862<br>(2.828)    | 1.306<br>(2.630)    | 10.49**<br>(3.355)  | 8.291**<br>(3.069)  | 2.321<br>(2.925)     | 0.157<br>(2.698)     | 6.369<br>(3.845)    | 3.989<br>(3.657)    |
| emergency                                    | -20.03*<br>(8.599)  | -13.46<br>(8.025)   | -1.006<br>(7.535)   | 4.194<br>(7.005)    | -15.54<br>(8.833)    | -10.05<br>(8.185)    | -10.56<br>(9.211)   | -5.121<br>(8.469)   |
| stay-home                                    | 93.91***<br>(14.88) | 85.31***<br>(14.45) | 74.77***<br>(15.87) | 67.93***<br>(15.23) | 73.17***<br>(17.51)  | 65.50***<br>(17.09)  | 0.921<br>(37.90)    | 15.35<br>(35.65)    |
| school closure                               | 41.72***<br>(5.972) | 41.67***<br>(5.580) | 42.24***<br>(6.401) | 41.72***<br>(6.260) | 45.00***<br>(5.971)  | 44.30***<br>(5.573)  | 49.00***<br>(5.911) | 47.98***<br>(5.650) |
| log(state death) *<br>stay-home              | -13.39**<br>(4.220) | -12.22**<br>(3.894) | -8.946*<br>(4.095)  | -8.211*<br>(3.776)  | -18.61***<br>(4.838) | -16.44***<br>(4.380) | -18.81**<br>(5.595) | -16.48**<br>(5.092) |
| log(total border states case)                |                     |                     |                     |                     |                      |                      | -5.466*<br>(2.584)  | -5.214*<br>(2.557)  |
| log(total border states case) *<br>stay-home |                     |                     |                     |                     |                      |                      | 12.21*<br>(4.861)   | 9.273*<br>(4.510)   |
| R2                                           | 0.804               | 0.808               | 0.812               | 0.815               | 0.692                | 0.698                | 0.805               | 0.809               |
| N                                            | 251992              |                     |                     |                     |                      |                      |                     |                     |

Table S10: Regression table for model 9-a, 9-b, 9-c in Table 2.

|                                           | Dep: log(dwelling time) |                          |                        |                          |                         |                          |                         |                          |
|-------------------------------------------|-------------------------|--------------------------|------------------------|--------------------------|-------------------------|--------------------------|-------------------------|--------------------------|
|                                           | Basic model             |                          | With Epidemic-Day FE   |                          | With stay-home-Day FE   |                          | With Border Spillovers  |                          |
| log(county death)                         | 0.0371***<br>(0.00803)  | 0.0227**<br>(0.00699)    | 0.0366***<br>(0.00724) | 0.0238***<br>(0.00589)   | 0.0377***<br>(0.00805)  | 0.0240**<br>(0.00706)    | 0.0362***<br>(0.00804)  | 0.0224**<br>(0.00715)    |
| log(state death)                          | 0.0508***<br>(0.00807)  | 0.0448***<br>(0.00800)   | 0.0399***<br>(0.00990) | 0.0352***<br>(0.00952)   | 0.0520***<br>(0.00843)  | 0.0461***<br>(0.00838)   | 0.0539***<br>(0.00823)  | 0.0480***<br>(0.00808)   |
| log(national death) * first county report |                         | 0.00719***<br>(0.000851) |                        | 0.00636***<br>(0.000735) |                         | 0.00681***<br>(0.000917) |                         | 0.00689***<br>(0.000848) |
| log(national death)                       | 0.00223<br>(0.00518)    | -0.00128<br>(0.00477)    | 0.0143*<br>(0.00617)   | 0.0114<br>(0.00575)      | -0.000180<br>(0.00547)  | -0.00312<br>(0.00501)    | 0.00793<br>(0.00730)    | 0.00467<br>(0.00689)     |
| emergency                                 | -0.0202<br>(0.0149)     | -0.0113<br>(0.0138)      | 0.0120<br>(0.0133)     | 0.0188<br>(0.0127)       | -0.0136<br>(0.0156)     | -0.00621<br>(0.0145)     | -0.00205<br>(0.0153)    | 0.00535<br>(0.0143)      |
| stay-home                                 | 0.190***<br>(0.0253)    | 0.178***<br>(0.0256)     | 0.151***<br>(0.0283)   | 0.141***<br>(0.0281)     | 0.151***<br>(0.0307)    | 0.140***<br>(0.0310)     | 0.0527<br>(0.0712)      | 0.0718<br>(0.0677)       |
| school closure                            | 0.0817***<br>(0.0105)   | 0.0814***<br>(0.00999)   | 0.0804***<br>(0.0122)  | 0.0795***<br>(0.0120)    | 0.0868***<br>(0.0105)   | 0.0856***<br>(0.0100)    | 0.0948***<br>(0.0113)   | 0.0931***<br>(0.0109)    |
| log(county death) * stay-home             | -0.0175*<br>(0.00804)   | -0.00455<br>(0.00732)    | -0.0164*<br>(0.00751)  | -0.00486<br>(0.00646)    | -0.0185*<br>(0.00815)   | -0.00597<br>(0.00751)    | -0.0177*<br>(0.00816)   | -0.00501<br>(0.00751)    |
| log(state death) * stay-home              | -0.0302***<br>(0.00665) | -0.0289***<br>(0.00632)  | -0.0208**<br>(0.00688) | -0.0201**<br>(0.00660)   | -0.0381***<br>(0.00786) | -0.0355***<br>(0.00752)  | -0.0383***<br>(0.00830) | -0.0355***<br>(0.00776)  |
| log(total border states case)             |                         |                          |                        |                          |                         |                          | -0.0112*<br>(0.00491)   | -0.0109*<br>(0.00486)    |
| log(total border states case) * stay-home |                         |                          |                        |                          |                         |                          | 0.0181*<br>(0.00837)    | 0.0141<br>(0.00789)      |
| R2                                        | 0.780                   | 0.783                    | 0.789                  | 0.791                    | 0.626                   | 0.630                    | 0.782                   | 0.784                    |

  

|                   | Dep: dwelling time  |                     |                      |                     |                       |                     |                        |                     |
|-------------------|---------------------|---------------------|----------------------|---------------------|-----------------------|---------------------|------------------------|---------------------|
|                   | Basic model         |                     | With Epidemic-Day FE |                     | With stay-home-Day FE |                     | With Border Spillovers |                     |
| log(county death) | 31.13***<br>(5.182) | 21.20***<br>(4.247) | 30.66***<br>(4.786)  | 21.63***<br>(3.676) | 31.45***<br>(5.195)   | 21.85***<br>(4.271) | 30.65***<br>(5.183)    | 21.10***<br>(4.373) |
| log(state death)  | 31.83***            | 27.70***            | 26.04***             | 22.68***            | 32.43***              | 28.34***            | 33.35***               | 29.26***            |

|                                           |                      |                      |                     |                     |                      |                      |                      |                      |
|-------------------------------------------|----------------------|----------------------|---------------------|---------------------|----------------------|----------------------|----------------------|----------------------|
|                                           | (4.806)              | (4.565)              | (5.507)             | (5.122)             | (4.975)              | (4.733)              | (5.070)              | (4.786)              |
| log(national death) * first county report |                      | 4.940***<br>(0.377)  |                     | 4.512***<br>(0.421) |                      | 4.758***<br>(0.425)  |                      | 4.769***<br>(0.396)  |
| log(national death)                       | 3.598<br>(2.807)     | 1.187<br>(2.606)     | 10.26**<br>(3.318)  | 8.183*<br>(3.059)   | 2.343<br>(2.902)     | 0.289<br>(2.674)     | 6.204<br>(3.845)     | 3.951<br>(3.652)     |
| emergency                                 | -18.83*<br>(8.562)   | -12.71<br>(7.996)    | 0.432<br>(7.391)    | 5.233<br>(6.928)    | -15.33<br>(8.780)    | -10.19<br>(8.144)    | -9.749<br>(9.058)    | -4.629<br>(8.344)    |
| stay-home                                 | 105.7***<br>(14.07)  | 97.12***<br>(13.62)  | 85.86***<br>(14.88) | 79.09***<br>(14.25) | 80.40***<br>(17.16)  | 72.93***<br>(16.79)  | 24.75<br>(36.07)     | 37.97<br>(33.64)     |
| school closure                            | 42.42***<br>(5.868)  | 42.18***<br>(5.512)  | 42.69***<br>(6.430) | 42.05***<br>(6.287) | 45.05***<br>(5.832)  | 44.22***<br>(5.486)  | 49.22***<br>(5.796)  | 48.09***<br>(5.564)  |
| log(county death) * stay-home             | -7.990<br>(5.218)    | 0.897<br>(4.492)     | -7.198<br>(4.891)   | 1.024<br>(3.986)    | -8.429<br>(5.219)    | 0.340<br>(4.486)     | -8.236<br>(5.350)    | 0.537<br>(4.703)     |
| log(state death) * stay-home              | -16.90***<br>(4.100) | -15.99***<br>(3.752) | -12.39**<br>(3.960) | -11.92**<br>(3.633) | -20.81***<br>(4.768) | -19.01***<br>(4.328) | -21.54***<br>(5.279) | -19.57***<br>(4.809) |
| log(total border states case)             |                      |                      |                     |                     |                      |                      | -5.412*<br>(2.593)   | -5.188<br>(2.582)    |
| log(total border states case) * stay-home |                      |                      |                     |                     |                      |                      | 10.60*<br>(4.563)    | 7.838<br>(4.239)     |
| R2                                        | 0.807                | 0.811                | 0.816               | 0.818               | 0.697                | 0.702                | 0.808                | 0.811                |
| N                                         | 251992               |                      |                     |                     |                      |                      |                      |                      |

Table S11: Behavior change associated with county-case reports and the rate of the change in case, use log-log model n 31 – April 21, 2020).

|                                             | Dep: log(dwell time)    |                          |                         |                          |
|---------------------------------------------|-------------------------|--------------------------|-------------------------|--------------------------|
| log(county case)                            | 0.0480***<br>(0.00375)  | 0.0384***<br>(0.00460)   | 0.0380***<br>(0.00454)  | 0.0306***<br>(0.00512)   |
| log(new county case/lagged county case)     | -0.0119***<br>(0.00242) | -0.0153***<br>(0.00232)  | -0.0114***<br>(0.00255) | -0.0140***<br>(0.00257)  |
| log(state case)                             |                         |                          | 0.0261**<br>(0.00859)   | 0.0257**<br>(0.00851)    |
| log(new state case/lagged state case)       |                         |                          | -0.0241***<br>(0.00520) | -0.0237***<br>(0.00516)  |
| log(national case)                          | -0.00149<br>(0.00353)   | -0.00251<br>(0.00333)    | -0.0140**<br>(0.00491)  | -0.0146**<br>(0.00484)   |
| log(national case) * first county report    |                         | 0.00260***<br>(0.000493) |                         | 0.00204***<br>(0.000418) |
| log(new national case/lagged national case) | -0.244***<br>(0.0192)   | -0.237***<br>(0.0182)    | -0.209***<br>(0.0227)   | -0.204***<br>(0.0221)    |
| emergency                                   | 0.0332**<br>(0.0121)    | 0.0352**<br>(0.0117)     | 0.0158<br>(0.0196)      | 0.0175<br>(0.0192)       |
| stay-home                                   | 0.155***<br>(0.0198)    | 0.146***<br>(0.0209)     | 0.167***<br>(0.0455)    | 0.161**<br>(0.0461)      |
| school closure                              | 0.124***<br>(0.00728)   | 0.123***<br>(0.00734)    | 0.0980***<br>(0.0152)   | 0.0977***<br>(0.0151)    |
| log(county case) * stay-home                | -0.0271***<br>(0.00394) | -0.0214***<br>(0.00448)  | -0.0218***<br>(0.00477) | -0.0173**<br>(0.00518)   |
| log(state case) * stay-home                 |                         |                          | -0.00560<br>(0.00655)   | -0.00578<br>(0.00660)    |
| N                                           | 251992                  |                          |                         |                          |

Table S12: Models with cumulative cases, new cases, and death reports together. While the main effect of county cases, stay-at-home orders, and their interaction are stable and consistent with the primary specifications, the main effects and interaction with the stay-at-home order for new case and death variables are not. This suggests insufficient variation among cumulative cases, new cases, and death to include them all in the model simultaneously.

|                                            | Dep: log(dwelling time) |                          |                         |                         |                         |                         |                         |                         |
|--------------------------------------------|-------------------------|--------------------------|-------------------------|-------------------------|-------------------------|-------------------------|-------------------------|-------------------------|
|                                            | Basic model             |                          | add death variables     |                         | add new case variables  |                         | add both                |                         |
| log(county case)                           | 0.0591***<br>(0.00411)  | 0.0429***<br>(0.00501)   | 0.0477***<br>(0.00432)  | 0.0396***<br>(0.00532)  | 0.0699***<br>(0.00606)  | 0.0549***<br>(0.00753)  | 0.0510***<br>(0.00673)  | 0.0429***<br>(0.00733)  |
| log(national case) * first county report   |                         | 0.00410***<br>(0.000723) |                         | -0.00359<br>(0.00260)   |                         | 0.0200**<br>(0.00668)   |                         | -0.112***<br>(0.0201)   |
| log(national case)                         | -0.00548<br>(0.00422)   | -0.00685<br>(0.00389)    | -0.0929***<br>(0.00400) | -0.0901***<br>(0.00394) | 0.0246**<br>(0.00743)   | 0.0191*<br>(0.00738)    | -0.0679***<br>(0.00357) | -0.0675***<br>(0.00359) |
| log(county case) * stay-home               | -0.0336***<br>(0.00447) | -0.0237***<br>(0.00521)  | -0.0368***<br>(0.00490) | -0.0351***<br>(0.00566) | -0.0509***<br>(0.00657) | -0.0458***<br>(0.00771) | -0.0502***<br>(0.00708) | -0.0429***<br>(0.00746) |
| log(county death)                          |                         |                          | -0.0216**<br>(0.00632)  | -0.0145*<br>(0.00688)   |                         |                         | -0.0179*<br>(0.00698)   | -0.0124<br>(0.00663)    |
| log(national death) * first county report  |                         |                          |                         | 0.00830*<br>(0.00379)   |                         |                         |                         | 0.0363***<br>(0.0101)   |
| log(national death)                        |                         |                          | 0.0915***<br>(0.00539)  | 0.0869***<br>(0.00532)  |                         |                         | 0.0887***<br>(0.00449)  | 0.0960***<br>(0.00468)  |
| log(county death) * stay-home              |                         |                          | 0.0346***<br>(0.00675)  | 0.0328***<br>(0.00722)  |                         |                         | 0.0234**<br>(0.00711)   | 0.0242***<br>(0.00670)  |
| log(new county case)                       |                         |                          |                         |                         | -0.0409***<br>(0.00620) | -0.0314***<br>(0.00632) | -0.0185*<br>(0.00703)   | -0.0200**<br>(0.00645)  |
| log(new county case) * first county report |                         |                          |                         |                         |                         | -0.0207*<br>(0.00814)   |                         | 0.108***<br>(0.0167)    |
| log(new national case)                     |                         |                          |                         |                         | -0.0308***<br>(0.00418) | -0.0271***<br>(0.00417) | -0.0221***<br>(0.00277) | -0.0279***<br>(0.00300) |
| log(new county case) * stay-home           |                         |                          |                         |                         | 0.0463***<br>(0.00701)  | 0.0452***<br>(0.00722)  | 0.0401***<br>(0.00751)  | 0.0336***<br>(0.00691)  |
| emergency                                  | 0.0152<br>(0.0168)      | 0.0188<br>(0.0159)       | 0.0575***<br>(0.0155)   | 0.0613***<br>(0.0150)   | 0.0354**<br>(0.0128)    | 0.0387**<br>(0.0128)    | 0.0682***<br>(0.0140)   | 0.0722***<br>(0.0138)   |
| stay-home                                  | 0.201***<br>(0.0214)    | 0.183***<br>(0.0235)     | 0.156***<br>(0.0184)    | 0.151***<br>(0.0192)    | 0.184***<br>(0.0209)    | 0.175***<br>(0.0226)    | 0.147***<br>(0.0178)    | 0.133***<br>(0.0180)    |
| school closure                             | 0.145***                | 0.143***                 | 0.158***                | 0.158***                | 0.139***                | 0.142***                | 0.151***                | 0.133***                |

---

|   |          |          |           |           |           |           |           |           |
|---|----------|----------|-----------|-----------|-----------|-----------|-----------|-----------|
|   | (0.0100) | (0.0100) | (0.00788) | (0.00798) | (0.00873) | (0.00867) | (0.00744) | (0.00780) |
| N | 251992   |          |           |           |           |           |           |           |

---

---



Table S13: Repeating Models 1-3 with levels of time at home and cases.

| (model 1)                                  | Dep: dwell time            |                            |                            |                            |                            |                            |                            |                            |
|--------------------------------------------|----------------------------|----------------------------|----------------------------|----------------------------|----------------------------|----------------------------|----------------------------|----------------------------|
|                                            | Basic model                |                            | With Epidemic-Day FE       |                            | With stay-home-Day FE      |                            | With Border Spillovers     |                            |
| county case                                | 0.113<br>(0.0923)          | 0.112<br>(0.0916)          | 0.0945<br>(0.0784)         | 0.0918<br>(0.0767)         | 0.104<br>(0.0848)          | 0.102<br>(0.0831)          | 0.0869<br>(0.0746)         | 0.0863<br>(0.0742)         |
| national case *<br>first county<br>report  |                            | 0.00000825<br>(0.0000113)  |                            | 0.0000171<br>(0.00000971)  |                            | 0.0000153<br>(0.0000109)   |                            | 0.00000417<br>(0.0000115)  |
| national case                              | 0.000178***<br>(0.0000147) | 0.000171***<br>(0.0000209) | 0.000217***<br>(0.0000176) | 0.000202***<br>(0.0000215) | 0.000202***<br>(0.0000200) | 0.000190***<br>(0.0000237) | 0.000138***<br>(0.0000185) | 0.000135***<br>(0.0000252) |
| emergency                                  | 1.511<br>(3.761)           | 1.597<br>(3.749)           | 38.00***<br>(5.717)        | 38.20***<br>(5.687)        | 0.575<br>(3.845)           | 0.691<br>(3.831)           | 1.737<br>(3.561)           | 1.777<br>(3.546)           |
| stay-home                                  | 78.05***<br>(7.676)        | 77.85***<br>(7.667)        | 66.82***<br>(8.862)        | 66.21***<br>(8.927)        | 51.36***<br>(11.05)        | 51.21***<br>(11.05)        | 96.67***<br>(8.490)        | 96.59***<br>(8.421)        |
| school closure                             | 81.01***<br>(4.160)        | 81.30***<br>(4.173)        | 78.55***<br>(11.55)        | 78.96***<br>(11.64)        | 77.99***<br>(4.008)        | 78.40***<br>(4.044)        | 72.78***<br>(4.654)        | 72.92***<br>(4.555)        |
| county case *<br>stay-home                 | -0.111<br>(0.0902)         | -0.110<br>(0.0896)         | -0.0920<br>(0.0763)        | -0.0894<br>(0.0746)        | -0.102<br>(0.0824)         | -0.0993<br>(0.0808)        | -0.0850<br>(0.0727)        | -0.0845<br>(0.0723)        |
| total border<br>states case                |                            |                            |                            |                            |                            |                            | 0.00195**<br>(0.000640)    | 0.00195**<br>(0.000640)    |
| total border<br>states case *<br>stay-home |                            |                            |                            |                            |                            |                            | -0.00175**<br>(0.000613)   | -0.00175**<br>(0.000616)   |
| R2                                         | 0.802                      | 0.802                      | 0.813                      | 0.813                      | 0.689                      | 0.689                      | 0.804                      | 0.805                      |

  

| (model 2)                                 | Dep: dwell time            |                            |                            |                            |                            |                            |                            |                            |
|-------------------------------------------|----------------------------|----------------------------|----------------------------|----------------------------|----------------------------|----------------------------|----------------------------|----------------------------|
|                                           | Basic model                |                            | With Epidemic-Day FE       |                            | With stay-home-Day FE      |                            | With Border Spillovers     |                            |
| state case                                | 0.0210***<br>(0.00585)     | 0.0210***<br>(0.00587)     | 0.0171*<br>(0.00666)       | 0.0171*<br>(0.00670)       | 0.0198**<br>(0.00592)      | 0.0198**<br>(0.00592)      | 0.0156**<br>(0.00561)      | 0.0157**<br>(0.00563)      |
| national case *<br>first county<br>report |                            | 0.00000980<br>(0.0000116)  |                            | 0.0000167<br>(0.00001000)  |                            | 0.0000150<br>(0.0000109)   |                            | 0.00000613<br>(0.0000114)  |
| national case                             | 0.000157***<br>(0.0000158) | 0.000149***<br>(0.0000230) | 0.000209***<br>(0.0000166) | 0.000194***<br>(0.0000210) | 0.000176***<br>(0.0000233) | 0.000164***<br>(0.0000281) | 0.000134***<br>(0.0000187) | 0.000129***<br>(0.0000256) |
| emergency                                 | 0.356<br>(3.508)           | 0.447<br>(3.483)           | 39.01***<br>(5.432)        | 39.19***<br>(5.418)        | -0.221<br>(3.536)          | -0.109<br>(3.518)          | 0.868<br>(3.408)           | 0.923<br>(3.386)           |
| stay-home                                 | 98.17***<br>(10.18)        | 97.99***<br>(10.18)        | 83.80***<br>(14.02)        | 83.29***<br>(14.07)        | 66.73***<br>(14.34)        | 66.58***<br>(14.34)        | 105.2***<br>(10.29)        | 105.1***<br>(10.26)        |
| school closure                            | 68.42***<br>(5.883)        | 68.73***<br>(5.788)        | 69.60***<br>(9.049)        | 69.98***<br>(9.121)        | 66.86***<br>(5.499)        | 67.26***<br>(5.459)        | 66.21***<br>(6.058)        | 66.40***<br>(5.940)        |

|                                            |                            |                            |                            |                            |                            |                            |                            |                            |
|--------------------------------------------|----------------------------|----------------------------|----------------------------|----------------------------|----------------------------|----------------------------|----------------------------|----------------------------|
| state case *<br>stay-home                  | -0.0206***<br>(0.00576)    | -0.0206***<br>(0.00579)    | -0.0167*<br>(0.00659)      | -0.0167*<br>(0.00664)      | -0.0193**<br>(0.00582)     | -0.0193**<br>(0.00583)     | -0.0154**<br>(0.00553)     | -0.0154**<br>(0.00555)     |
| total border<br>states case                |                            |                            |                            |                            |                            |                            | 0.00133*<br>(0.000582)     | 0.00133*<br>(0.000583)     |
| total border<br>states case *<br>stay-home |                            |                            |                            |                            |                            |                            | -0.00117*<br>(0.000566)    | -0.00117*<br>(0.000569)    |
| R2                                         | 0.805                      | 0.805                      | 0.815                      | 0.815                      | 0.693                      | 0.693                      | 0.806                      | 0.806                      |
| (model 3)                                  | Dep: dwell time            |                            |                            |                            |                            |                            |                            |                            |
|                                            | Basic model                |                            | With Epidemic-Day FE       |                            | With stay-home-Day FE      |                            | With Border Spillovers     |                            |
| county case                                | 0.0552<br>(0.0657)         | 0.0539<br>(0.0647)         | 0.0512<br>(0.0591)         | 0.0486<br>(0.0574)         | 0.0524<br>(0.0630)         | 0.0501<br>(0.0615)         | 0.0526<br>(0.0605)         | 0.0518<br>(0.0600)         |
| state case                                 | 0.0206***<br>(0.00560)     | 0.0206***<br>(0.00562)     | 0.0168*<br>(0.00652)       | 0.0168*<br>(0.00656)       | 0.0194**<br>(0.00569)      | 0.0194**<br>(0.00570)      | 0.0153**<br>(0.00542)      | 0.0153**<br>(0.00544)      |
| national case *<br>first county<br>report  |                            | 0.00000912<br>(0.0000115)  |                            | 0.0000161<br>(0.00000996)  |                            | 0.0000144<br>(0.0000109)   |                            | 0.00000554<br>(0.0000114)  |
| national case                              | 0.000157***<br>(0.0000159) | 0.000149***<br>(0.0000230) | 0.000208***<br>(0.0000166) | 0.000195***<br>(0.0000210) | 0.000175***<br>(0.0000233) | 0.000164***<br>(0.0000280) | 0.000134***<br>(0.0000186) | 0.000130***<br>(0.0000256) |
| emergency                                  | 0.322<br>(3.515)           | 0.408<br>(3.491)           | 38.97***<br>(5.430)        | 39.14***<br>(5.417)        | -0.256<br>(3.542)          | -0.148<br>(3.525)          | 0.833<br>(3.416)           | 0.883<br>(3.394)           |
| stay-home                                  | 98.37***<br>(10.31)        | 98.20***<br>(10.30)        | 83.98***<br>(14.12)        | 83.48***<br>(14.15)        | 66.87***<br>(14.44)        | 66.72***<br>(14.44)        | 105.4***<br>(10.33)        | 105.3***<br>(10.29)        |
| school closure                             | 68.36***<br>(5.911)        | 68.66***<br>(5.817)        | 69.59***<br>(9.053)        | 69.96***<br>(9.122)        | 66.80***<br>(5.523)        | 67.19***<br>(5.483)        | 66.16***<br>(6.067)        | 66.33***<br>(5.945)        |
| county case *<br>stay-home                 | -0.0538<br>(0.0638)        | -0.0525<br>(0.0629)        | -0.0498<br>(0.0573)        | -0.0472<br>(0.0556)        | -0.0508<br>(0.0610)        | -0.0486<br>(0.0595)        | -0.0513<br>(0.0588)        | -0.0505<br>(0.0582)        |
| state case *<br>stay-home                  | -0.0203***<br>(0.00553)    | -0.0203***<br>(0.00556)    | -0.0163*<br>(0.00647)      | -0.0164*<br>(0.00652)      | -0.0190**<br>(0.00562)     | -0.0190**<br>(0.00563)     | -0.0151**<br>(0.00536)     | -0.0151**<br>(0.00539)     |
| total border<br>states case                |                            |                            |                            |                            |                            |                            | 0.00133*<br>(0.000583)     | 0.00132*<br>(0.000584)     |
| total border<br>states case *<br>stay-home |                            |                            |                            |                            |                            |                            | -0.00117*<br>(0.000567)    | -0.00117*<br>(0.000569)    |
| R2                                         | 0.805                      | 0.805                      | 0.815                      | 0.815                      | 0.693                      | 0.693                      | 0.806                      | 0.806                      |



Table S14: Repeating Models 4-6 with levels of time at home and cases.

| (model 4)                                  | Dep: dwell time          |                           |                          |                           |                          |                           |                          |                           |
|--------------------------------------------|--------------------------|---------------------------|--------------------------|---------------------------|--------------------------|---------------------------|--------------------------|---------------------------|
|                                            | Basic model              |                           | With Epidemic-Day FE     |                           | With stay-home-Day FE    |                           | With Border Spillovers   |                           |
| new county case                            | 0.123<br>(0.149)         | 0.102<br>(0.133)          | 0.136<br>(0.152)         | 0.113<br>(0.135)          | 0.119<br>(0.149)         | 0.101<br>(0.134)          | 0.109<br>(0.138)         | 0.0927<br>(0.126)         |
| new national case *<br>first county report |                          | 0.000895***<br>(0.000122) |                          | 0.000940***<br>(0.000141) |                          | 0.000779***<br>(0.000126) |                          | 0.000769***<br>(0.000115) |
| new national case                          | 0.00685***<br>(0.000215) | 0.00609***<br>(0.000252)  | 0.00730***<br>(0.000359) | 0.00656***<br>(0.000353)  | 0.00664***<br>(0.000261) | 0.00601***<br>(0.000279)  | 0.00644***<br>(0.000230) | 0.00584***<br>(0.000274)  |
| emergency                                  | -8.827**<br>(2.988)      | -8.028**<br>(2.960)       | 18.69***<br>(5.258)      | 20.35***<br>(5.361)       | -7.203*<br>(3.120)       | -6.642*<br>(3.093)        | -7.820*<br>(2.936)       | -7.245*<br>(2.920)        |
| stay-home                                  | 38.86***<br>(5.511)      | 35.94***<br>(5.623)       | 37.99***<br>(6.515)      | 35.01***<br>(6.370)       | 17.76<br>(9.519)         | 17.13<br>(9.550)          | 39.57***<br>(5.713)      | 36.52***<br>(5.738)       |
| school closure                             | 12.17**<br>(3.713)       | 15.49***<br>(3.810)       | 15.79**<br>(4.741)       | 18.38***<br>(4.596)       | 15.06***<br>(4.084)      | 17.43***<br>(4.122)       | 14.08***<br>(3.625)      | 16.78***<br>(3.715)       |
| new county case *<br>stay-home             | -0.0724<br>(0.100)       | -0.0548<br>(0.0863)       | -0.0853<br>(0.105)       | -0.0659<br>(0.0897)       | -0.0754<br>(0.104)       | -0.0597<br>(0.0907)       | -0.0707<br>(0.0963)      | -0.0562<br>(0.0848)       |
| total border states<br>case                |                          |                           |                          |                           |                          |                           | 0.000560<br>(0.000352)   | 0.000475<br>(0.000357)    |
| total border states<br>case * stay-home    |                          |                           |                          |                           |                          |                           | -0.000292<br>(0.000342)  | -0.000230<br>(0.000349)   |
| R2                                         | 0.821                    | 0.822                     | 0.827                    | 0.828                     | 0.719                    | 0.720                     | 0.822                    | 0.823                     |

  

| (model 5)                                  | Dep: dwell time          |                           |                          |                           |                          |                           |                          |                           |
|--------------------------------------------|--------------------------|---------------------------|--------------------------|---------------------------|--------------------------|---------------------------|--------------------------|---------------------------|
|                                            | Basic model              |                           | With Epidemic-Day FE     |                           | With stay-home-Day FE    |                           | With Border Spillovers   |                           |
| new state case                             | 0.00858<br>(0.00975)     | 0.00805<br>(0.00995)      | 0.00973<br>(0.00859)     | 0.00906<br>(0.00839)      | 0.00947<br>(0.0100)      | 0.00877<br>(0.0100)       | 0.00631<br>(0.00888)     | 0.00629<br>(0.00938)      |
| new national case *<br>first county report |                          | 0.000872***<br>(0.000118) |                          | 0.000923***<br>(0.000141) |                          | 0.000768***<br>(0.000123) |                          | 0.000765***<br>(0.000115) |
| new national case                          | 0.00678***<br>(0.000231) | 0.00604***<br>(0.000272)  | 0.00726***<br>(0.000356) | 0.00654***<br>(0.000349)  | 0.00660***<br>(0.000271) | 0.00598***<br>(0.000294)  | 0.00641***<br>(0.000237) | 0.00582***<br>(0.000285)  |
| emergency                                  | -8.352**<br>(2.995)      | -7.614*<br>(2.975)        | 19.11***<br>(5.248)      | 20.71***<br>(5.349)       | -6.925*<br>(3.127)       | -6.388*<br>(3.105)        | -7.585*<br>(2.930)       | -7.033*<br>(2.919)        |
| stay-home                                  | 36.93***<br>(5.763)      | 34.27***<br>(5.923)       | 36.58***<br>(6.675)      | 33.79***<br>(6.584)       | 17.44<br>(9.816)         | 16.83<br>(9.882)          | 38.91***<br>(5.825)      | 35.95***<br>(5.885)       |
| school closure                             | 11.65**<br>(3.766)       | 14.90***<br>(3.856)       | 14.81**<br>(4.778)       | 17.41***<br>(4.638)       | 14.26**<br>(4.092)       | 16.65***<br>(4.127)       | 13.55***<br>(3.747)      | 16.23***<br>(3.832)       |

|                                         |                       |                       |                       |                       |                       |                       |                         |                         |
|-----------------------------------------|-----------------------|-----------------------|-----------------------|-----------------------|-----------------------|-----------------------|-------------------------|-------------------------|
| new state case *<br>stay-home           | -0.00202<br>(0.00693) | -0.00198<br>(0.00739) | -0.00353<br>(0.00651) | -0.00331<br>(0.00642) | -0.00413<br>(0.00749) | -0.00372<br>(0.00769) | -0.00208<br>(0.00699)   | -0.00228<br>(0.00756)   |
| total border states<br>case             |                       |                       |                       |                       |                       |                       | 0.000551<br>(0.000356)  | 0.000465<br>(0.000361)  |
| total border states<br>case * stay-home |                       |                       |                       |                       |                       |                       | -0.000304<br>(0.000345) | -0.000241<br>(0.000352) |
| R2                                      | 0.821                 | 0.822                 | 0.827                 | 0.828                 | 0.719                 | 0.720                 | 0.822                   | 0.823                   |

| (model 6)                                  | Dep: dwell time          |                           |                          |                           |                          |                           |                          |                           |
|--------------------------------------------|--------------------------|---------------------------|--------------------------|---------------------------|--------------------------|---------------------------|--------------------------|---------------------------|
|                                            | Basic model              |                           | With Epidemic-Day FE     |                           | With stay-home-Day FE    |                           | With Border Spillovers   |                           |
| new county case                            | 0.104<br>(0.130)         | 0.0841<br>(0.114)         | 0.114<br>(0.138)         | 0.0933<br>(0.120)         | 0.0990<br>(0.129)        | 0.0824<br>(0.115)         | 0.0968<br>(0.125)        | 0.0801<br>(0.111)         |
| new state case                             | 0.00740<br>(0.00870)     | 0.00709<br>(0.00904)      | 0.00842<br>(0.00760)     | 0.00798<br>(0.00747)      | 0.00834<br>(0.00897)     | 0.00782<br>(0.00911)      | 0.00522<br>(0.00807)     | 0.00537<br>(0.00865)      |
| new national case *<br>first county report |                          | 0.000865***<br>(0.000116) |                          | 0.000915***<br>(0.000139) |                          | 0.000762***<br>(0.000121) |                          | 0.000760***<br>(0.000113) |
| new national case                          | 0.00679***<br>(0.000230) | 0.00605***<br>(0.000268)  | 0.00727***<br>(0.000356) | 0.00654***<br>(0.000348)  | 0.00660***<br>(0.000270) | 0.00599***<br>(0.000291)  | 0.00642***<br>(0.000236) | 0.00582***<br>(0.000282)  |
| emergency                                  | -8.373**<br>(2.998)      | -7.638*<br>(2.977)        | 19.12***<br>(5.248)      | 20.70***<br>(5.346)       | -6.951*<br>(3.130)       | -6.416*<br>(3.107)        | -7.610*<br>(2.932)       | -7.059*<br>(2.921)        |
| stay-home                                  | 36.93***<br>(5.772)      | 34.29***<br>(5.934)       | 36.56***<br>(6.681)      | 33.79***<br>(6.591)       | 17.48<br>(9.842)         | 16.87<br>(9.907)          | 38.93***<br>(5.830)      | 36.00***<br>(5.891)       |
| school closure                             | 11.63**<br>(3.761)       | 14.85***<br>(3.848)       | 14.80**<br>(4.773)       | 17.38***<br>(4.628)       | 14.22**<br>(4.090)       | 16.60***<br>(4.123)       | 13.51***<br>(3.746)      | 16.17***<br>(3.828)       |
| new county case *<br>stay-home             | -0.0690<br>(0.0889)      | -0.0518<br>(0.0750)       | -0.0788<br>(0.0962)      | -0.0600<br>(0.0804)       | -0.0674<br>(0.0906)      | -0.0526<br>(0.0780)       | -0.0670<br>(0.0878)      | -0.0520<br>(0.0755)       |
| new state case *<br>stay-home              | -0.00143<br>(0.00659)    | -0.00156<br>(0.00714)     | -0.00283<br>(0.00619)    | -0.00279<br>(0.00616)     | -0.00353<br>(0.00709)    | -0.00328<br>(0.00738)     | -0.00147<br>(0.00676)    | -0.00182<br>(0.00737)     |
| total border states<br>case                |                          |                           |                          |                           |                          |                           | 0.000549<br>(0.000355)   | 0.000464<br>(0.000361)    |
| total border states<br>case * stay-home    |                          |                           |                          |                           |                          |                           | -0.000305<br>(0.000345)  | -0.000242<br>(0.000352)   |
| R2                                         | 0.821                    | 0.822                     | 0.827                    | 0.828                     | 0.719                    | 0.720                     | 0.822                    | 0.823                     |

N

251992

Table S15: Repeating Models 7-9 with levels of time at home and cases.

| (model 7)                                  | Dep: dwell time          |                          |                          |                          |                          |                          |                          |                          |
|--------------------------------------------|--------------------------|--------------------------|--------------------------|--------------------------|--------------------------|--------------------------|--------------------------|--------------------------|
|                                            | Basic model              |                          | With Epidemic-Day FE     |                          | With stay-home-Day FE    |                          | With Border Spillovers   |                          |
| county death                               | 4.927<br>(2.786)         | 4.912<br>(2.779)         | 3.785<br>(2.155)         | 3.722<br>(2.124)         | 4.907<br>(2.716)         | 4.875<br>(2.697)         | 3.080<br>(1.815)         | 3.085<br>(1.821)         |
| national death<br>* first county<br>report |                          | 0.0000822<br>(0.000266)  |                          | 0.000269<br>(0.000209)   |                          | 0.000137<br>(0.000261)   |                          | -0.0000271<br>(0.000268) |
| national death                             | 0.00245***<br>(0.000290) | 0.00238***<br>(0.000444) | 0.00263***<br>(0.000370) | 0.00240***<br>(0.000449) | 0.00248***<br>(0.000505) | 0.00237***<br>(0.000592) | 0.00158***<br>(0.000346) | 0.00161**<br>(0.000503)  |
| emergency                                  | 2.867<br>(3.828)         | 2.902<br>(3.812)         | 28.64***<br>(6.298)      | 28.76***<br>(6.282)      | 2.659<br>(3.945)         | 2.701<br>(3.929)         | 2.793<br>(3.537)         | 2.783<br>(3.516)         |
| stay-home                                  | 96.59***<br>(8.139)      | 96.51***<br>(8.092)      | 79.66***<br>(11.13)      | 79.24***<br>(11.15)      | 56.73***<br>(12.16)      | 56.67***<br>(12.16)      | 117.2***<br>(8.263)      | 117.3***<br>(8.168)      |
| school closure                             | 92.88***<br>(5.531)      | 92.97***<br>(5.490)      | 86.57***<br>(14.13)      | 86.74***<br>(14.18)      | 92.68***<br>(5.081)      | 92.80***<br>(5.076)      | 78.56***<br>(5.905)      | 78.54***<br>(5.785)      |
| county death *<br>stay-home                | -4.922<br>(2.780)        | -4.907<br>(2.773)        | -3.779<br>(2.149)        | -3.716<br>(2.118)        | -4.900<br>(2.710)        | -4.868<br>(2.691)        | -3.079<br>(1.810)        | -3.084<br>(1.816)        |
| total border<br>states case                |                          |                          |                          |                          |                          |                          | 0.00266***<br>(0.000746) | 0.00266***<br>(0.000745) |
| total border<br>states case *<br>stay-home |                          |                          |                          |                          |                          |                          | -0.00235**<br>(0.000701) | -0.00235**<br>(0.000702) |
| R2                                         | 0.794                    | 0.794                    | 0.806                    | 0.807                    | 0.676                    | 0.676                    | 0.800                    | 0.800                    |

  

| (model 8)                                  | Dep: dwell time          |                          |                          |                          |                         |                         |                          |                          |
|--------------------------------------------|--------------------------|--------------------------|--------------------------|--------------------------|-------------------------|-------------------------|--------------------------|--------------------------|
|                                            | Basic model              |                          | With Epidemic-Day FE     |                          | With stay-home-Day FE   |                         | With Border Spillovers   |                          |
| state death                                | 0.978***<br>(0.184)      | 0.978***<br>(0.185)      | 0.711**<br>(0.228)       | 0.711**<br>(0.228)       | 1.013***<br>(0.214)     | 1.013***<br>(0.213)     | 0.596**<br>(0.186)       | 0.596**<br>(0.186)       |
| national death<br>* first county<br>report |                          | 0.0000929<br>(0.000268)  |                          | 0.000244<br>(0.000217)   |                         | 0.000104<br>(0.000260)  |                          | -0.0000129<br>(0.000265) |
| national death                             | 0.00207***<br>(0.000274) | 0.00199***<br>(0.000452) | 0.00246***<br>(0.000335) | 0.00225***<br>(0.000430) | 0.00186**<br>(0.000534) | 0.00178**<br>(0.000659) | 0.00154***<br>(0.000336) | 0.00155**<br>(0.000498)  |
| emergency                                  | 0.988<br>(3.753)         | 1.025<br>(3.725)         | 29.29***<br>(6.124)      | 29.39***<br>(6.113)      | 0.946<br>(3.768)        | 0.979<br>(3.746)        | 1.745<br>(3.519)         | 1.740<br>(3.493)         |
| stay-home                                  | 115.8***<br>(9.005)      | 115.7***<br>(8.932)      | 95.58***<br>(14.53)      | 95.21***<br>(14.52)      | 72.09***<br>(14.33)     | 72.04***<br>(14.31)     | 123.0***<br>(9.326)      | 123.0***<br>(9.243)      |
| school closure                             | 80.56***<br>(6.799)      | 80.65***<br>(6.712)      | 79.24***<br>(11.90)      | 79.40***<br>(11.94)      | 80.69***<br>(6.679)     | 80.78***<br>(6.615)     | 74.82***<br>(6.919)      | 74.81***<br>(6.801)      |

|                                            |                          |                          |                          |                          |                          |                         |                          |                          |
|--------------------------------------------|--------------------------|--------------------------|--------------------------|--------------------------|--------------------------|-------------------------|--------------------------|--------------------------|
| state death *<br>stay-home                 | -0.973***<br>(0.184)     | -0.973***<br>(0.184)     | -0.706**<br>(0.227)      | -0.705**<br>(0.228)      | -1.008***<br>(0.214)     | -1.007***<br>(0.213)    | -0.593**<br>(0.186)      | -0.593**<br>(0.186)      |
| total border<br>states case                |                          |                          |                          |                          |                          |                         | 0.00199**<br>(0.000645)  | 0.00199**<br>(0.000645)  |
| total border<br>states case *<br>stay-home |                          |                          |                          |                          |                          |                         | -0.00173**<br>(0.000614) | -0.00173**<br>(0.000615) |
| R2                                         | 0.798                    | 0.798                    | 0.809                    | 0.809                    | 0.683                    | 0.683                   | 0.801                    | 0.801                    |
| (model 9)                                  | Dep: dwell time          |                          |                          |                          |                          |                         |                          |                          |
|                                            | Basic model              |                          | With Epidemic-Day FE     |                          | With stay-home-Day FE    |                         | With Border Spillovers   |                          |
| county death                               | 1.731<br>(1.543)         | 1.676<br>(1.520)         | 1.762<br>(1.394)         | 1.661<br>(1.346)         | 1.786<br>(1.575)         | 1.729<br>(1.547)        | 1.653<br>(1.349)         | 1.623<br>(1.342)         |
| state death                                | 0.899***<br>(0.171)      | 0.900***<br>(0.172)      | 0.669**<br>(0.219)       | 0.669**<br>(0.220)       | 0.948***<br>(0.202)      | 0.946***<br>(0.202)     | 0.546**<br>(0.179)       | 0.547**<br>(0.180)       |
| national death<br>* first county<br>report |                          | 0.000256<br>(0.000280)   |                          | 0.000402<br>(0.000221)   |                          | 0.000246<br>(0.000267)  |                          | 0.000141<br>(0.000280)   |
| national death                             | 0.00241***<br>(0.000253) | 0.00219***<br>(0.000442) | 0.00281***<br>(0.000329) | 0.00247***<br>(0.000428) | 0.00210***<br>(0.000540) | 0.00191**<br>(0.000668) | 0.00191***<br>(0.000319) | 0.00179***<br>(0.000491) |
| emergency                                  | 9.580*<br>(4.078)        | 9.603*<br>(4.069)        | 38.60***<br>(6.550)      | 38.67***<br>(6.537)      | 9.630*<br>(4.011)        | 9.639*<br>(4.004)       | 10.47*<br>(3.936)        | 10.48*<br>(3.930)        |
| stay-home                                  | 110.5***<br>(8.038)      | 110.3***<br>(8.046)      | 92.94***<br>(13.83)      | 92.30***<br>(13.88)      | 68.78***<br>(13.13)      | 68.66***<br>(13.14)     | 116.5***<br>(8.409)      | 116.4***<br>(8.404)      |
| school closure                             | 87.20***<br>(6.451)      | 87.42***<br>(6.403)      | 85.49***<br>(12.04)      | 85.72***<br>(12.12)      | 87.48***<br>(6.398)      | 87.66***<br>(6.363)     | 82.15***<br>(6.553)      | 82.27***<br>(6.478)      |
| county death<br>* stay-home                | -1.731<br>(1.537)        | -1.676<br>(1.515)        | -1.762<br>(1.389)        | -1.662<br>(1.341)        | -1.786<br>(1.570)        | -1.730<br>(1.542)       | -1.655<br>(1.345)        | -1.625<br>(1.337)        |
| state death *<br>stay-home                 | -0.893***<br>(0.170)     | -0.895***<br>(0.172)     | -0.663**<br>(0.218)      | -0.663**<br>(0.220)      | -0.942***<br>(0.202)     | -0.941***<br>(0.202)    | -0.543**<br>(0.179)      | -0.544**<br>(0.180)      |
| total border<br>states case                |                          |                          |                          |                          |                          |                         | 0.00184**<br>(0.000592)  | 0.00184**<br>(0.000595)  |
| total border<br>states case *<br>stay-home |                          |                          |                          |                          |                          |                         | -0.00157**<br>(0.000564) | -0.00157**<br>(0.000569) |
| R2                                         | 0.798                    | 0.798                    | 0.809                    | 0.809                    | 0.683                    | 0.683                   | 0.801                    | 0.801                    |





Table S16: Model 1 with time not at home as the dependent variable.

|                                                 | Dep: log(non-dwell time) |                         |                         |                         |                        |                         |                        |                        |
|-------------------------------------------------|--------------------------|-------------------------|-------------------------|-------------------------|------------------------|-------------------------|------------------------|------------------------|
|                                                 | Basic model              |                         | With Epidemic-Day FE    |                         | With stay-home-Day FE  |                         | With Border Spillovers |                        |
| log(county case)                                | -0.124***<br>(0.0106)    | -0.122***<br>(0.0134)   | -0.106***<br>(0.0117)   | -0.111***<br>(0.0140)   | -0.124***<br>(0.0106)  | -0.124***<br>(0.0137)   | -0.116***<br>(0.0105)  | -0.115***<br>(0.0133)  |
| log(national case)<br>* first county<br>report  |                          | -0.000468<br>(0.00193)  |                         | 0.00118<br>(0.00188)    |                        | 0.0000803<br>(0.00203)  |                        | -0.000279<br>(0.00207) |
| log(national case)                              | -0.0420***<br>(0.00966)  | -0.0418***<br>(0.00933) | -0.0505***<br>(0.00798) | -0.0507***<br>(0.00792) | -0.0404***<br>(0.0100) | -0.0404***<br>(0.00972) | -0.0139<br>(0.0118)    | -0.0138<br>(0.0116)    |
| emergency                                       | 0.0178<br>(0.0501)       | 0.0174<br>(0.0495)      | -0.0286<br>(0.0342)     | -0.0280<br>(0.0342)     | 0.0144<br>(0.0496)     | 0.0144<br>(0.0491)      | 0.0481<br>(0.0443)     | 0.0479<br>(0.0438)     |
| stay-home                                       | -0.280***<br>(0.0457)    | -0.278***<br>(0.0476)   | -0.205***<br>(0.0479)   | -0.209***<br>(0.0485)   | -0.172**<br>(0.0504)   | -0.172**<br>(0.0517)    | -0.475*<br>(0.231)     | -0.475*<br>(0.231)     |
| school closure                                  | -0.592***<br>(0.0297)    | -0.592***<br>(0.0298)   | -0.534***<br>(0.0323)   | -0.535***<br>(0.0323)   | -0.597***<br>(0.0318)  | -0.597***<br>(0.0321)   | -0.563***<br>(0.0358)  | -0.563***<br>(0.0360)  |
| log(county case)<br>* stay-home                 | 0.0139<br>(0.0120)       | 0.0128<br>(0.0114)      | -0.00346<br>(0.0127)    | -0.000647<br>(0.0121)   | 0.0153<br>(0.0128)     | 0.0155<br>(0.0129)      | 0.00708<br>(0.0113)    | 0.00638<br>(0.0112)    |
| log(total border<br>states case)                |                          |                         |                         |                         |                        |                         | -0.0401**<br>(0.0140)  | -0.0401**<br>(0.0140)  |
| log(total border<br>states case) *<br>stay-home |                          |                         |                         |                         |                        |                         | 0.0237<br>(0.0244)     | 0.0238<br>(0.0248)     |
| R2                                              | 0.773                    | 0.773                   | 0.783                   | 0.783                   | 0.724                  | 0.724                   | 0.774                  | 0.774                  |

  

|                                                | Dep: non-dwell time  |                      |                      |                      |                       |                      |                        |                      |
|------------------------------------------------|----------------------|----------------------|----------------------|----------------------|-----------------------|----------------------|------------------------|----------------------|
|                                                | Basic model          |                      | With Epidemic-Day FE |                      | With stay-home-Day FE |                      | With Border Spillovers |                      |
| log(county case)                               | -13.01***<br>(0.963) | -8.472***<br>(1.072) | -10.97***<br>(1.043) | -7.294***<br>(1.085) | -13.01***<br>(0.962)  | -8.512***<br>(1.113) | -11.91***<br>(0.986)   | -7.735***<br>(1.120) |
| log(national case)<br>* first county<br>report |                      | -1.150***<br>(0.164) |                      | -0.955***<br>(0.156) |                       | -1.139***<br>(0.178) |                        | -1.065***<br>(0.160) |

|                                                 |                      |                      |                      |                      |                      |                      |                      |                      |
|-------------------------------------------------|----------------------|----------------------|----------------------|----------------------|----------------------|----------------------|----------------------|----------------------|
| log(national case)                              | -1.028<br>(0.957)    | -0.642<br>(0.909)    | -1.051<br>(0.933)    | -0.889<br>(0.914)    | -0.957<br>(0.987)    | -0.630<br>(0.940)    | 3.217*<br>(1.509)    | 3.452*<br>(1.466)    |
| emergency                                       | -16.36*<br>(7.280)   | -17.40*<br>(7.126)   | -20.39**<br>(6.161)  | -20.95**<br>(6.135)  | -16.50*<br>(7.180)   | -17.31*<br>(7.052)   | -12.98<br>(6.610)    | -13.85*<br>(6.493)   |
| stay-home                                       | -22.77***<br>(4.245) | -17.76***<br>(4.734) | -15.18***<br>(4.249) | -11.24*<br>(4.434)   | -19.64***<br>(4.388) | -15.85**<br>(4.582)  | -22.57<br>(14.48)    | -22.43<br>(14.63)    |
| school closure                                  | -72.79***<br>(5.331) | -72.10***<br>(5.353) | -64.43***<br>(3.690) | -63.74***<br>(3.673) | -73.04***<br>(5.499) | -72.20***<br>(5.527) | -69.64***<br>(6.207) | -68.90***<br>(6.208) |
| log(county case)<br>* stay-home                 | 7.173***<br>(0.799)  | 4.401***<br>(0.946)  | 5.555***<br>(0.929)  | 3.274**<br>(1.007)   | 7.220***<br>(0.930)  | 4.382***<br>(1.157)  | 6.805***<br>(0.882)  | 4.148***<br>(0.994)  |
| log(total border<br>states case)                |                      |                      |                      |                      |                      |                      | -5.688**<br>(2.015)  | -5.580**<br>(2.005)  |
| log(total border<br>states case) *<br>stay-home |                      |                      |                      |                      |                      |                      | 0.315<br>(1.600)     | 0.801<br>(1.606)     |
| R2                                              | 0.745                | 0.746                | 0.756                | 0.756                | 0.694                | 0.695                | 0.747                | 0.748                |
| N                                               | 251992               |                      |                      |                      |                      |                      |                      |                      |

Table S17: Model 2 with time not at home as the dependent variable.

|                                                 | Dep: log(non-dwell time) |                         |                         |                         |                        |                         |                        |                         |
|-------------------------------------------------|--------------------------|-------------------------|-------------------------|-------------------------|------------------------|-------------------------|------------------------|-------------------------|
|                                                 | Basic model              |                         | With Epidemic-Day FE    |                         | With stay-home-Day FE  |                         | With Border Spillovers |                         |
| log(state case)                                 | -0.0757***<br>(0.0189)   | -0.0614**<br>(0.0181)   | -0.0890***<br>(0.0196)  | -0.0770***<br>(0.0189)  | -0.0765***<br>(0.0188) | -0.0626**<br>(0.0181)   | -0.0675***<br>(0.0190) | -0.0547**<br>(0.0181)   |
| log(national case)<br>* first county<br>report  |                          | -0.0131***<br>(0.00158) |                         | -0.0107***<br>(0.00162) |                        | -0.0126***<br>(0.00161) |                        | -0.0129***<br>(0.00156) |
| log(national case)                              | -0.0201<br>(0.0147)      | -0.0172<br>(0.0141)     | -0.0413***<br>(0.00880) | -0.0390***<br>(0.00848) | -0.0165<br>(0.0148)    | -0.0145<br>(0.0143)     | 0.00100<br>(0.0151)    | 0.00175<br>(0.0145)     |
| emergency                                       | 0.119*<br>(0.0566)       | 0.0841<br>(0.0536)      | 0.0635<br>(0.0335)      | 0.0429<br>(0.0315)      | 0.110<br>(0.0586)      | 0.0787<br>(0.0553)      | 0.135**<br>(0.0490)    | 0.101*<br>(0.0464)      |
| stay-home                                       | -0.157<br>(0.155)        | -0.141<br>(0.155)       | -0.145<br>(0.178)       | -0.126<br>(0.179)       | -0.135<br>(0.162)      | -0.110<br>(0.160)       | -0.254<br>(0.250)      | -0.278<br>(0.256)       |
| school closure                                  | -0.540***<br>(0.0311)    | -0.533***<br>(0.0309)   | -0.469***<br>(0.0335)   | -0.463***<br>(0.0319)   | -0.550***<br>(0.0325)  | -0.540***<br>(0.0323)   | -0.524***<br>(0.0381)  | -0.516***<br>(0.0378)   |
| log(state case) *<br>stay-home                  | -0.0164<br>(0.0189)      | -0.0147<br>(0.0192)     | -0.00876<br>(0.0229)    | -0.00879<br>(0.0234)    | -0.00145<br>(0.0217)   | -0.00334<br>(0.0216)    | -0.0179<br>(0.0223)    | -0.0194<br>(0.0219)     |
| log(total border<br>states case)                |                          |                         |                         |                         |                        |                         | -0.0342<br>(0.0172)    | -0.0311<br>(0.0166)     |
| log(total border<br>states case) *<br>stay-home |                          |                         |                         |                         |                        |                         | 0.0126<br>(0.0287)     | 0.0194<br>(0.0291)      |
| R2                                              | 0.766                    | 0.768                   | 0.776                   | 0.778                   | 0.716                  | 0.718                   | 0.767                  | 0.769                   |
|                                                 | Dep: non-dwell time      |                         |                         |                         |                        |                         |                        |                         |
|                                                 | Basic model              |                         | With Epidemic-Day FE    |                         | With stay-home-Day FE  |                         | With Border Spillovers |                         |
| log(state case)                                 | -8.562***<br>(2.298)     | -6.688**<br>(2.193)     | -8.897***<br>(2.373)    | -7.200**<br>(2.351)     | -8.585***<br>(2.275)   | -6.695**<br>(2.168)     | -7.208**<br>(2.282)    | -5.570*<br>(2.167)      |
| log(national case)<br>* first county<br>report  |                          | -1.716***<br>(0.179)    |                         | -1.506***<br>(0.145)    |                        | -1.707***<br>(0.182)    |                        | -1.645***<br>(0.164)    |

|                                                 |           |           |           |           |           |           |           |           |
|-------------------------------------------------|-----------|-----------|-----------|-----------|-----------|-----------|-----------|-----------|
| log(national case)                              | 1.692     | 2.075     | -0.0609   | 0.260     | 1.848     | 2.122     | 4.885*    | 4.980**   |
|                                                 | (1.614)   | (1.508)   | (1.030)   | (0.993)   | (1.552)   | (1.466)   | (1.903)   | (1.801)   |
| emergency                                       | -5.736    | -10.36    | -11.38    | -14.28*   | -6.151    | -10.42    | -3.871    | -8.269    |
|                                                 | (8.779)   | (8.307)   | (6.173)   | (6.106)   | (8.686)   | (8.206)   | (7.510)   | (7.160)   |
| stay-home                                       | -26.80*   | -24.75*   | -32.28*   | -29.64*   | -26.84    | -23.50    | -27.37    | -30.42*   |
|                                                 | (13.01)   | (12.08)   | (14.21)   | (13.66)   | (15.13)   | (14.22)   | (13.98)   | (13.95)   |
| school closure                                  | -67.02*** | -66.07*** | -58.06*** | -57.21*** | -67.50*** | -66.26*** | -65.42*** | -64.36*** |
|                                                 | (4.417)   | (4.597)   | (4.333)   | (4.315)   | (4.611)   | (4.816)   | (5.648)   | (5.766)   |
| log(state case) *<br>stay-home                  | 1.984     | 2.212     | 3.585*    | 3.581*    | 2.536     | 2.279     | 2.721     | 2.533     |
|                                                 | (1.698)   | (1.548)   | (1.778)   | (1.724)   | (2.266)   | (2.100)   | (2.106)   | (2.020)   |
| log(total border<br>states case)                |           |           |           |           | 251992    | 251992    | -5.074*   | -4.676*   |
|                                                 |           |           |           |           | 0.692     | 0.696     | (2.368)   | (2.292)   |
| log(total border<br>states case) *<br>stay-home |           |           |           |           |           |           | -0.409    | 0.453     |
|                                                 |           |           |           |           |           |           | (2.189)   | (2.262)   |
| R2                                              | 0.744     | 0.747     | 0.754     | 0.757     | 0.692     | 0.696     | 0.745     | 0.748     |
| N                                               | 251992    |           |           |           |           |           |           |           |

Table S18: Model 3 with time not at home as the dependent variable.

|                                                 | Dep: log(non-dwell time) |                       |                         |                         |                        |                       |                         |                       |
|-------------------------------------------------|--------------------------|-----------------------|-------------------------|-------------------------|------------------------|-----------------------|-------------------------|-----------------------|
|                                                 | Basic model              |                       | With Epidemic-Day FE    |                         | With stay-home-Day FE  |                       | With Border Spillovers  |                       |
| log(county case)                                | -0.103***<br>(0.00998)   | -0.106***<br>(0.0126) | -0.0834***<br>(0.00998) | -0.0912***<br>(0.0125)  | -0.103***<br>(0.00991) | -0.108***<br>(0.0127) | -0.0998***<br>(0.00999) | -0.102***<br>(0.0130) |
| log(state case)                                 | -0.0518**<br>(0.0179)    | -0.0520**<br>(0.0180) | -0.0692***<br>(0.0189)  | -0.0697***<br>(0.0188)  | -0.0518**<br>(0.0179)  | -0.0522**<br>(0.0180) | -0.0467*<br>(0.0183)    | -0.0468*<br>(0.0183)  |
| log(national case)<br>* first county<br>report  |                          | 0.000761<br>(0.00187) |                         | 0.00208<br>(0.00182)    |                        | 0.00121<br>(0.00192)  |                         | 0.000545<br>(0.00192) |
| log(national case)                              | -0.0183<br>(0.0139)      | -0.0184<br>(0.0138)   | -0.0386***<br>(0.00841) | -0.0389***<br>(0.00839) | -0.0172<br>(0.0141)    | -0.0174<br>(0.0140)   | -0.000553<br>(0.0143)   | -0.000634<br>(0.0143) |
| emergency                                       | 0.0650<br>(0.0546)       | 0.0659<br>(0.0544)    | 0.0268<br>(0.0312)      | 0.0283<br>(0.0312)      | 0.0640<br>(0.0548)     | 0.0652<br>(0.0548)    | 0.0843<br>(0.0474)      | 0.0848<br>(0.0471)    |
| stay-home                                       | -0.333*<br>(0.146)       | -0.335*<br>(0.144)    | -0.325<br>(0.177)       | -0.332<br>(0.174)       | -0.252<br>(0.152)      | -0.256<br>(0.151)     | -0.554*<br>(0.238)      | -0.554*<br>(0.237)    |
| school closure                                  | -0.543***<br>(0.0297)    | -0.543***<br>(0.0298) | -0.469***<br>(0.0318)   | -0.470***<br>(0.0319)   | -0.546***<br>(0.0313)  | -0.547***<br>(0.0315) | -0.523***<br>(0.0366)   | -0.523***<br>(0.0368) |
| log(county case)<br>* stay-home                 | 0.00121<br>(0.0106)      | 0.00303<br>(0.0104)   | -0.0195<br>(0.0106)     | -0.0145<br>(0.0105)     | 0.00113<br>(0.0114)    | 0.00407<br>(0.0116)   | -0.00338<br>(0.0108)    | -0.00206<br>(0.0109)  |
| log(state case) *<br>stay-home                  | 0.0156<br>(0.0173)       | 0.0155<br>(0.0174)    | 0.0270<br>(0.0225)      | 0.0269<br>(0.0226)      | 0.0186<br>(0.0197)     | 0.0186<br>(0.0197)    | 0.00639<br>(0.0204)     | 0.00643<br>(0.0204)   |
| log(total border<br>states case)                |                          |                       |                         |                         | 251992<br>0.726        | 251992<br>0.726       | -0.0296<br>(0.0174)     | -0.0296<br>(0.0174)   |
| log(total border<br>states case) *<br>stay-home |                          |                       |                         |                         |                        |                       | 0.0328<br>(0.0283)      | 0.0325<br>(0.0286)    |
| R2                                              | 0.775                    | 0.775                 | 0.785                   | 0.785                   | 0.726                  | 0.726                 | 0.775                   | 0.775                 |

  

|                  | Dep: non-dwell time  |                      |                      |                      |                       |                      |                        |                      |
|------------------|----------------------|----------------------|----------------------|----------------------|-----------------------|----------------------|------------------------|----------------------|
|                  | Basic model          |                      | With Epidemic-Day FE |                      | With stay-home-Day FE |                      | With Border Spillovers |                      |
| log(county case) | -10.47***<br>(1.052) | -6.558***<br>(1.065) | -8.712***<br>(0.926) | -5.353***<br>(0.984) | -10.47***<br>(1.047)  | -6.603***<br>(1.084) | -10.03***<br>(1.028)   | -6.259***<br>(1.092) |
| log(state case)  | -6.333**<br>(2.248)  | -6.035**<br>(2.198)  | -6.826**<br>(2.391)  | -6.622**<br>(2.379)  | -6.322**<br>(2.226)   | -6.019**<br>(2.178)  | -5.243*<br>(2.225)     | -4.991*<br>(2.175)   |

|                                                 |                      |                      |                      |                      |                      |                      |                      |                      |
|-------------------------------------------------|----------------------|----------------------|----------------------|----------------------|----------------------|----------------------|----------------------|----------------------|
| log(national case)<br>* first county<br>report  |                      | -1.021***<br>(0.165) |                      | -0.889***<br>(0.147) |                      | -1.011***<br>(0.171) |                      | -0.984***<br>(0.156) |
| log(national case)                              | 1.808<br>(1.551)     | 1.999<br>(1.506)     | 0.149<br>(1.008)     | 0.267<br>(0.993)     | 1.855<br>(1.501)     | 2.008<br>(1.465)     | 4.662*<br>(1.852)    | 4.808*<br>(1.811)    |
| emergency                                       | -10.31<br>(8.434)    | -11.43<br>(8.258)    | -14.44*<br>(6.147)   | -15.08*<br>(6.106)   | -10.38<br>(8.279)    | -11.39<br>(8.121)    | -8.326<br>(7.276)    | -9.336<br>(7.136)    |
| stay-home                                       | -34.59*<br>(13.58)   | -31.26*<br>(13.02)   | -39.70**<br>(14.59)  | -36.80*<br>(14.15)   | -32.09*<br>(15.09)   | -28.73<br>(14.68)    | -38.03**<br>(13.95)  | -37.40**<br>(13.71)  |
| school closure                                  | -66.62***<br>(4.530) | -66.26***<br>(4.590) | -57.94***<br>(4.244) | -57.49***<br>(4.260) | -66.82***<br>(4.761) | -66.37***<br>(4.826) | -65.02***<br>(5.732) | -64.55***<br>(5.767) |
| log(county case)<br>* stay-home                 | 5.416***<br>(0.946)  | 2.972**<br>(1.070)   | 3.555***<br>(0.764)  | 1.440<br>(0.833)     | 5.428***<br>(0.971)  | 2.979*<br>(1.120)    | 5.195***<br>(0.904)  | 2.801**<br>(0.998)   |
| log(state case) *<br>stay-home                  | 2.631<br>(1.824)     | 2.733<br>(1.764)     | 4.397*<br>(1.848)    | 4.472*<br>(1.792)    | 2.664<br>(2.286)     | 2.623<br>(2.215)     | 3.038<br>(2.246)     | 2.976<br>(2.201)     |
| log(total border<br>states case)                |                      |                      |                      |                      |                      |                      | -4.566<br>(2.350)    | -4.522<br>(2.323)    |
| log(total border<br>states case) *<br>stay-home |                      |                      |                      |                      |                      |                      | 0.169<br>(2.241)     | 0.583<br>(2.267)     |
| R2                                              | 0.748                | 0.748                | 0.757                | 0.758                | 0.696                | 0.697                | 0.749                | 0.750                |
| N                                               | 251992               |                      |                      |                      |                      |                      |                      |                      |

Table S19: Metro and non-metro time at home comparison without interactions for the period Jan 31 – April 21, 2020.

| (with interaction)                       | Metro Counties      |                     |                         |                          | Non-metro Counties   |                      |                         |                          |
|------------------------------------------|---------------------|---------------------|-------------------------|--------------------------|----------------------|----------------------|-------------------------|--------------------------|
|                                          | Dep: dwell time     |                     | Dep: log(dwell time)    |                          | Dep: dwell time      |                      | Dep: log(dwell time)    |                          |
| log(county case)                         | 35.75***<br>(2.685) | 28.52***<br>(2.624) | 0.0549***<br>(0.00367)  | 0.0418***<br>(0.00364)   | 50.42***<br>(3.866)  | 34.72***<br>(4.658)  | 0.0847***<br>(0.00781)  | 0.0593***<br>(0.00984)   |
| log(national case) * first county report |                     | 2.599***<br>(0.547) |                         | 0.00468***<br>(0.000638) |                      | 2.756***<br>(0.426)  |                         | 0.00446***<br>(0.000837) |
| log(national case)                       | -2.521<br>(2.173)   | -3.445<br>(2.103)   | -0.0106**<br>(0.00315)  | -0.0122***<br>(0.00298)  | 0.821<br>(2.595)     | 0.151<br>(2.435)     | -0.00543<br>(0.00472)   | -0.00651<br>(0.00442)    |
| emergency                                | 8.977<br>(10.06)    | 9.956<br>(9.870)    | 0.0382*<br>(0.0150)     | 0.0400**<br>(0.0146)     | -8.211<br>(10.16)    | -6.188<br>(9.672)    | 0.00941<br>(0.0183)     | 0.0127<br>(0.0174)       |
| stay-home                                | 111.6***<br>(9.566) | 96.77***<br>(11.03) | 0.192***<br>(0.0148)    | 0.165***<br>(0.0166)     | 116.8***<br>(12.96)  | 108.2***<br>(13.60)  | 0.214***<br>(0.0249)    | 0.201***<br>(0.0265)     |
| school closure                           | 67.71***<br>(5.237) | 64.45***<br>(5.069) | 0.116***<br>(0.00807)   | 0.111***<br>(0.00802)    | 80.26***<br>(6.016)  | 78.75***<br>(5.929)  | 0.158***<br>(0.0115)    | 0.156***<br>(0.0115)     |
| log(county case) * stay-home             | -8.388**<br>(2.707) | -2.882<br>(2.952)   | -0.0208***<br>(0.00369) | -0.0109**<br>(0.00402)   | -34.02***<br>(4.338) | -26.88***<br>(4.681) | -0.0636***<br>(0.00891) | -0.0520***<br>(0.00974)  |
| R2                                       | 0.840               | 0.841               | 0.822                   | 0.823                    | 0.756                | 0.757                | 0.737                   | 0.738                    |
| (without interaction)                    | Metro Counties      |                     |                         |                          | Non-metro Counties   |                      |                         |                          |
|                                          | Dep: dwell time     |                     | Dep: log(dwell time)    |                          | Dep: dwell time      |                      | Dep: log(dwell time)    |                          |
| log(county case)                         | 29.03***<br>(1.933) | 25.85***<br>(1.914) | 0.0382***<br>(0.00224)  | 0.0317***<br>(0.00209)   | 24.79***<br>(2.101)  | 10.33***<br>(1.852)  | 0.0368***<br>(0.00405)  | 0.0121**<br>(0.00395)    |
| log(national case) * first county report |                     | 2.934***<br>(0.519) |                         | 0.00595***<br>(0.000616) |                      | 3.860***<br>(0.429)  |                         | 0.00659***<br>(0.000794) |



|                    |          |          |            |            |          |          |           |           |
|--------------------|----------|----------|------------|------------|----------|----------|-----------|-----------|
| log(national case) | -1.859   | -3.392   | -0.00893** | -0.0120*** | 2.390    | 0.990    | -0.00249  | -0.00488  |
|                    | (2.201)  | (2.104)  | (0.00322)  | (0.00298)  | (2.596)  | (2.374)  | (0.00466) | (0.00424) |
| emergency          | 9.533    | 10.23    | 0.0396*    | 0.0410**   | -12.22   | -8.208   | 0.00192   | 0.00877   |
|                    | (10.11)  | (9.848)  | (0.0153)   | (0.0146)   | (10.30)  | (9.620)  | (0.0184)  | (0.0171)  |
| stay-home          | 94.67*** | 90.46*** | 0.149***   | 0.141***   | 89.44*** | 85.52*** | 0.163***  | 0.157***  |
|                    | (9.087)  | (8.897)  | (0.0143)   | (0.0135)   | (13.32)  | (12.85)  | (0.0244)  | (0.0237)  |
| school closure     | 72.61*** | 65.30*** | 0.129***   | 0.114***   | 86.86*** | 82.81*** | 0.171***  | 0.164***  |
|                    | (5.511)  | (5.070)  | (0.00850)  | (0.00813)  | (5.810)  | (5.745)  | (0.0110)  | (0.0111)  |
| R2                 | 0.839    | 0.840    | 0.820      | 0.823      | 0.752    | 0.755    | 0.732     | 0.735     |
| N                  | 94796    |          |            |            | 157136   |          |           |           |

Table S20: No stay-home policy counties and stay-home policy counties endogenous behavior comparison (no interaction between case and policy, Jan 31 – April 21, 2020)

|                                          | Stay-home Policy Counties (2605 counties)   |                      |                      |                      |                         |                          |                         |                          |
|------------------------------------------|---------------------------------------------|----------------------|----------------------|----------------------|-------------------------|--------------------------|-------------------------|--------------------------|
|                                          | Dep: dwell time                             |                      |                      |                      | Dep: log(dwell time)    |                          |                         |                          |
| log(county case)                         | 25.52***<br>(1.415)                         | 22.29***<br>(1.575)  | 36.71***<br>(2.406)  | 31.82***<br>(2.565)  | 0.0301***<br>(0.00217)  | 0.0228***<br>(0.00202)   | 0.0597***<br>(0.00350)  | 0.0501***<br>(0.00378)   |
| log(national case) * first county report |                                             | 1.818***<br>(0.328)  |                      | 1.229***<br>(0.314)  |                         | 0.00411***<br>(0.000595) |                         | 0.00243***<br>(0.000613) |
| log(national case)                       | -5.456**<br>(1.593)                         | -6.127***<br>(1.528) | -5.992***<br>(1.615) | -6.316***<br>(1.557) | -0.0153***<br>(0.00276) | -0.0168***<br>(0.00256)  | -0.0167***<br>(0.00274) | -0.0173***<br>(0.00260)  |
| emergency                                | 17.34*<br>(8.176)                           | 18.32*<br>(8.037)    | 16.77*<br>(8.162)    | 17.57*<br>(8.025)    | 0.0529***<br>(0.0139)   | 0.0551***<br>(0.0134)    | 0.0513***<br>(0.0137)   | 0.0529***<br>(0.0134)    |
| stay-home                                | 125.6***<br>(7.757)                         | 121.4***<br>(7.901)  | 138.0***<br>(7.971)  | 132.1***<br>(8.662)  | 0.223***<br>(0.0154)    | 0.214***<br>(0.0156)     | 0.256***<br>(0.0156)    | 0.244***<br>(0.0171)     |
| school closure                           | 75.36***<br>(6.379)                         | 72.86***<br>(6.259)  | 70.82***<br>(6.092)  | 70.23***<br>(6.073)  | 0.143***<br>(0.0111)    | 0.137***<br>(0.0112)     | 0.131***<br>(0.0107)    | 0.130***<br>(0.0108)     |
| log(county case) * stay-home             |                                             |                      | -12.37***<br>(2.576) | -9.374**<br>(2.669)  |                         |                          | -0.0327***<br>(0.00399) | -0.0268***<br>(0.00455)  |
| R2                                       | 0.821                                       | 0.821                | 0.821                | 0.822                | 0.796                   | 0.798                    | 0.799                   | 0.799                    |
| N                                        | 212,002                                     |                      |                      |                      |                         |                          |                         |                          |
|                                          | No stay-home Policy Counties (498 counties) |                      |                      |                      |                         |                          |                         |                          |
|                                          | Dep: dwell time                             |                      |                      |                      | Dep: log(dwell time)    |                          |                         |                          |
| log(county case)                         | 34.19***<br>(2.862)                         | 18.75***<br>(2.073)  |                      |                      | 0.0478***<br>(0.00489)  | 0.0191**<br>(0.00381)    |                         |                          |
| log(national case) * first county report |                                             | 3.992***<br>(0.452)  |                      |                      |                         | 0.00743***<br>(0.000813) |                         |                          |
| log(national case)                       | 11.99**                                     | 10.09*               |                      |                      | 0.0154*                 | 0.0118*                  |                         |                          |

|                   |          |          |           |           |
|-------------------|----------|----------|-----------|-----------|
| emergency         | (3.292)  | (2.911)  | (0.00563) | (0.00484) |
|                   | -46.12*  | -40.24*  | -0.0624   | -0.0514   |
|                   | (15.78)  | (14.92)  | (0.0284)  | (0.0266)  |
| school<br>closure | 93.91*** | 90.19*** | 0.181***  | 0.174***  |
|                   | (13.87)  | (13.78)  | (0.0255)  | (0.0253)  |
| R2                | 0.731    | 0.734    | 0.710     | 0.714     |
| N                 | 39,990   |          |           |           |

Table S21: Regression using partial identification to find a lower bound for the response to county cases and associated responses to national cases and policy orders.

|                                          | Use County FE & Daily FE for 1st column |                                           |                                      |                                      | Use State x Daily & County FE for 1st column |                                           |                                     |                                     |
|------------------------------------------|-----------------------------------------|-------------------------------------------|--------------------------------------|--------------------------------------|----------------------------------------------|-------------------------------------------|-------------------------------------|-------------------------------------|
|                                          | log(dwelling time)                      | log(dwelling time) net county case effect |                                      |                                      | log(dwelling time)                           | log(dwelling time) net county case effect |                                     |                                     |
| log(county case)                         | <b>0.0192***</b><br><b>(0.00322)</b>    |                                           |                                      |                                      | <b>0.0182***</b><br><b>(0.00206)</b>         |                                           |                                     |                                     |
| log(national case) * first county report |                                         | -0.00142<br>(0.00446)                     | -0.00605<br>(0.00378)                |                                      |                                              | -0.00132<br>(0.00447)                     | -0.00601<br>(0.00378)               |                                     |
| log(national case)                       |                                         |                                           | 0.00627***<br>(0.000631)             | 0.00572***<br>(0.000801)             |                                              |                                           | 0.00636***<br>(0.000634)            | 0.00582***<br>(0.000805)            |
| emergency                                | 0.00848<br>(0.00795)                    | 0.00757<br>(0.0180)                       | 0.0179<br>(0.0159)                   | -0.00346<br>(0.00609)                | -0.0224*<br>(0.0107)                         | 0.00738<br>(0.0180)                       | 0.0179<br>(0.0160)                  | -0.00338<br>(0.00609)               |
| stay-home                                | 0.0434***<br>(0.0109)                   | 0.173***<br>(0.0209)                      | 0.163***<br>(0.0209)                 | 0.156***<br>(0.0165)                 | 0.0524***<br>(0.00998)                       | 0.172***<br>(0.0209)                      | 0.162***<br>(0.0209)                | 0.155***<br>(0.0165)                |
| school closure                           | 0.00982<br>(0.00684)                    | 0.157***<br>(0.00968)                     | 0.146***<br>(0.00981)                | 0.131***<br>(0.0120)                 | -0.0269***<br>(0.00136)                      | 0.158***<br>(0.00968)                     | 0.146***<br>(0.00981)               | 0.132***<br>(0.0120)                |
| log(county case) * stay-home             | -0.00656*<br>(0.00289)                  | 0.000939<br>(0.00236)                     | <b>-0.00542*</b><br><b>(0.00260)</b> | <b>-0.00572*</b><br><b>(0.00255)</b> | -0.00702**<br>(0.00216)                      | 0.00180<br>(0.00236)                      | <b>-0.00465</b><br><b>(0.00261)</b> | <b>-0.00496</b><br><b>(0.00256)</b> |
| R2                                       | 0.865                                   | 0.749                                     | 0.753                                | 0.753                                | 0.884                                        | 0.750                                     | 0.754                               | 0.754                               |
| N                                        | 251992                                  |                                           |                                      |                                      |                                              |                                           |                                     |                                     |

Table S22: Endogenous behavior from county case reports and the stay-home policy's crowding-out effects by NAICS industry (Jan 31 - April 21, 2020)

|                                          | Sporting goods, hobby, & musical instrument | Gasoline stations         | General merchandise stores | Department stores          | Clothing Stores            |
|------------------------------------------|---------------------------------------------|---------------------------|----------------------------|----------------------------|----------------------------|
| log(county case)                         | -0.00360***<br>(0.000505)                   | -0.00287***<br>(0.000521) | -0.00212***<br>(0.000237)  | -0.00195***<br>(0.000184)  | -0.00179***<br>(0.000144)  |
| log(national case) * first county report | 0.0000692<br>(0.0000408)                    | -0.000192<br>(0.000134)   | -0.0000325<br>(0.0000449)  | 0.0000358*<br>(0.0000178)  | 0.0000583**<br>(0.0000182) |
| log(national case)                       | 0.000347***<br>(0.0000793)                  | 0.00146***<br>(0.000236)  | 0.00118***<br>(0.000295)   | 0.000353***<br>(0.0000378) | 0.000138***<br>(0.0000322) |
| emergency                                | -0.000166<br>(0.000512)                     | 0.00406**<br>(0.00120)    | 0.0136***<br>(0.00164)     | -0.000748**<br>(0.000231)  | -0.000477**<br>(0.000165)  |
| stay-home                                | -0.00261***<br>(0.000577)                   | -0.00680*<br>(0.00264)    | -0.00352***<br>(0.000912)  | -0.000738<br>(0.000392)    | -0.000380<br>(0.000237)    |
| school closure                           | -0.00486***<br>(0.000408)                   | -0.00982**<br>(0.00291)   | -0.0108***<br>(0.00219)    | -0.00281***<br>(0.000293)  | -0.00235***<br>(0.000192)  |
| log(county case) * stay-home             | 0.00110***<br>(0.000270)                    | 0.00191*<br>(0.000751)    | 0.00147***<br>(0.000230)   | 0.000722***<br>(0.000113)  | 0.000485***<br>(0.000109)  |
| R2                                       | 0.659                                       | 0.896                     | 0.870                      | 0.796                      | 0.605                      |

  

|                                          | Other miscellaneous store retailers | Grocery stores            | Health & personal care stores | Office supplies, stationery, & gift stores | Used merchandise stores     |
|------------------------------------------|-------------------------------------|---------------------------|-------------------------------|--------------------------------------------|-----------------------------|
| log(county case)                         | -0.00137***<br>(0.000152)           | -0.00132***<br>(0.000318) | -0.00108***<br>(0.000133)     | -0.000980***<br>(0.000109)                 | -0.000866***<br>(0.0000700) |
| log(national case) * first county report | 0.0000267<br>(0.0000157)            | -0.0000154<br>(0.0000649) | -0.0000437<br>(0.0000237)     | 0.0000153<br>(0.0000280)                   | -<br>(0.0000130)            |
| log(national case)                       | 0.000221***<br>(0.0000344)          | 0.000515*<br>(0.000219)   | 0.00000445<br>(0.0000787)     | 0.0000549<br>(0.0000312)                   | 0.000112***<br>(0.0000294)  |
| emergency                                | 0.000154<br>(0.000169)              | 0.0137***<br>(0.00114)    | 0.00221***<br>(0.000288)      | 0.000207<br>(0.000155)                     | -0.000192<br>(0.000175)     |
| stay-home                                | -0.000924**<br>(0.000268)           | -0.00476**<br>(0.00148)   | -0.00110*<br>(0.000510)       | -0.000740*<br>(0.000280)                   | -0.000975***<br>(0.000251)  |
| school closure                           | -0.00277***<br>(0.000199)           | -0.00467*<br>(0.00180)    | -0.00369***<br>(0.000403)     | -0.00218***<br>(0.000157)                  | -0.00279***<br>(0.000251)   |
| log(county case) * stay-home             | 0.000308**                          | 0.000961*                 | 0.000372**                    | 0.000333**                                 | 0.000294***                 |

|                                             | (0.000103)                    | (0.000380)                  | (0.000127)                   | (0.000101)                                        | (0.0000662)                 |
|---------------------------------------------|-------------------------------|-----------------------------|------------------------------|---------------------------------------------------|-----------------------------|
| R2                                          | 0.762                         | 0.788                       | 0.777                        | 0.710                                             | 0.745                       |
|                                             | Book stores &<br>news dealers | Furniture<br>Stores         | Shoe stores                  | Jewelry,<br>luggage, &<br>leather goods<br>stores | Specialty food<br>stores    |
| log(county case)                            | -0.000749***<br>(0.0000799)   | -0.000385***<br>(0.0000427) | -0.000359***<br>(0.0000378)  | -0.000291***<br>(0.0000441)                       | -0.000292***<br>(0.0000528) |
| log(national case) * first<br>county report | 0.0000301*<br>(0.0000124)     | -0.00000639<br>(0.00000808) | -0.00000635<br>(0.00000422)  | -0.00000400<br>(0.00000534)                       | -0.00000301<br>(0.00000977) |
| log(national case)                          | 0.0000207<br>(0.0000176)      | 0.0000511***<br>(0.0000132) | 0.0000566***<br>(0.00000795) | 0.0000413*<br>(0.0000157)                         | 0.0000309<br>(0.0000212)    |
| emergency                                   | -0.000319**<br>(0.0000934)    | -0.000169*<br>(0.0000649)   | -0.000203***<br>(0.0000393)  | -0.000134<br>(0.0000841)                          | -0.0000772<br>(0.0000802)   |
| stay-home                                   | -0.000147<br>(0.000101)       | -0.000539***<br>(0.000118)  | -0.0000251<br>(0.0000530)    | -0.000156<br>(0.000107)                           | -0.0000810<br>(0.000136)    |
| school closure                              | -0.000796***<br>(0.000104)    | -0.000872***<br>(0.0000909) | -0.000558***<br>(0.0000671)  | -0.000510***<br>(0.0000620)                       | -0.000586***<br>(0.000111)  |
| log(county case) * stay-<br>home            | 0.000201***<br>(0.0000568)    | 0.000134***<br>(0.0000358)  | 0.0000900**<br>(0.0000281)   | 0.0000539<br>(0.0000329)                          | 0.0000933*<br>(0.0000359)   |
| R2                                          | 0.647                         | 0.663                       | 0.687                        | 0.642                                             | 0.599                       |
| N                                           | 251992                        |                             |                              |                                                   |                             |
